# Supplementary material for: Acetic acid mediated regioselective synthesis of 2,4,5-trisubstituted thiazoles by a domino multicomponent reaction
Source: Royal Society of Chemistry journal article supplement (doi:10.1039/c9nj01717h), 2019-01-01

$^1\text{H}$  NMR of 5a

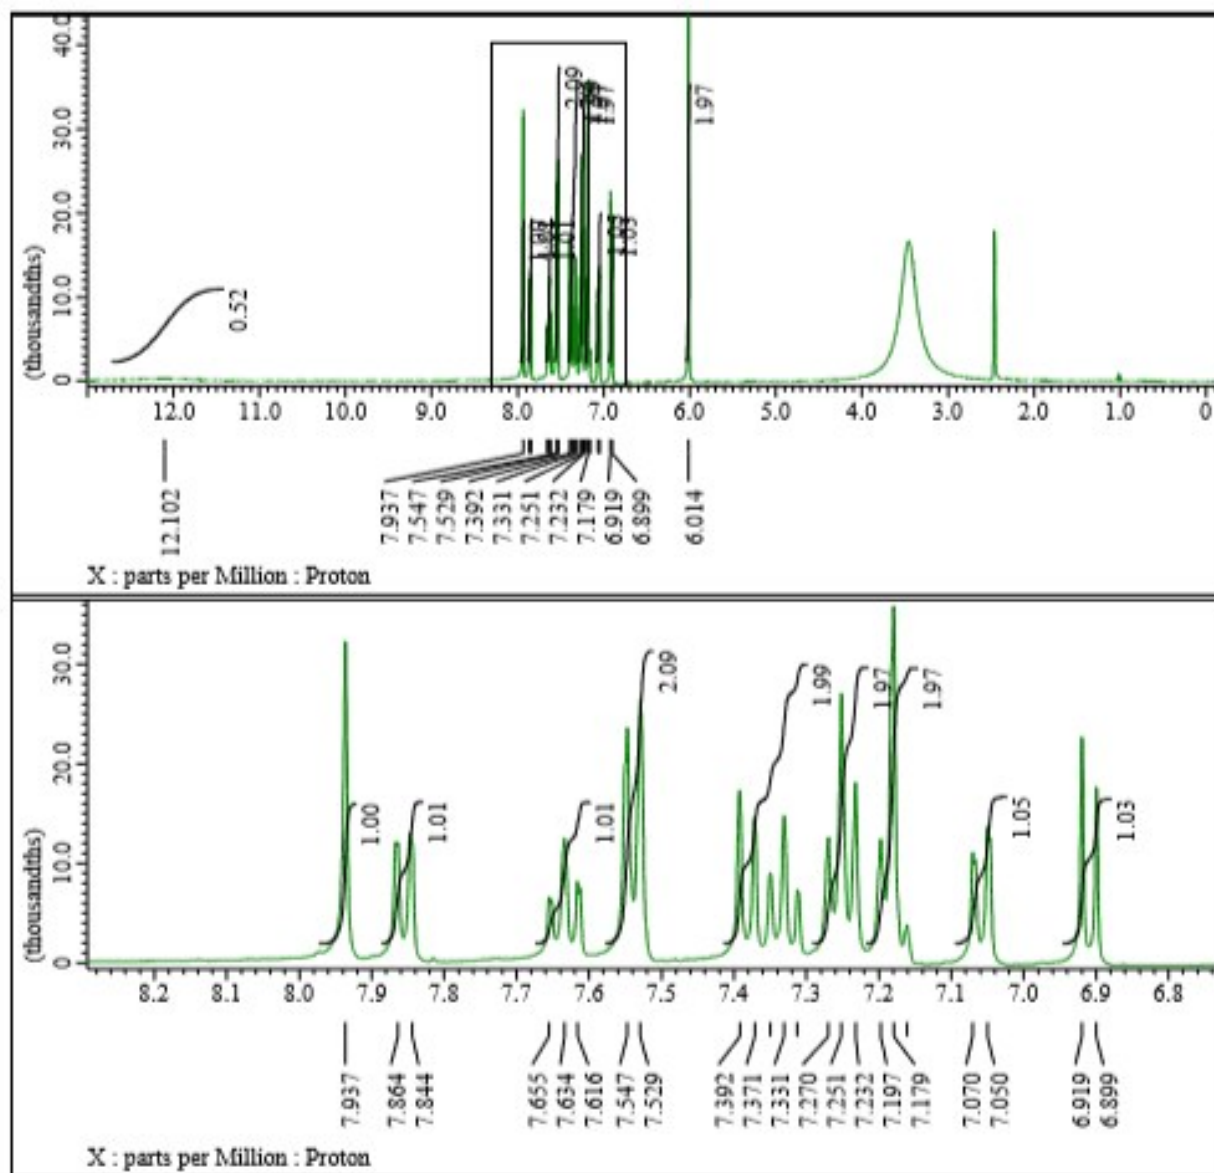

$^{13}\text{C}$  NMR of **5a**

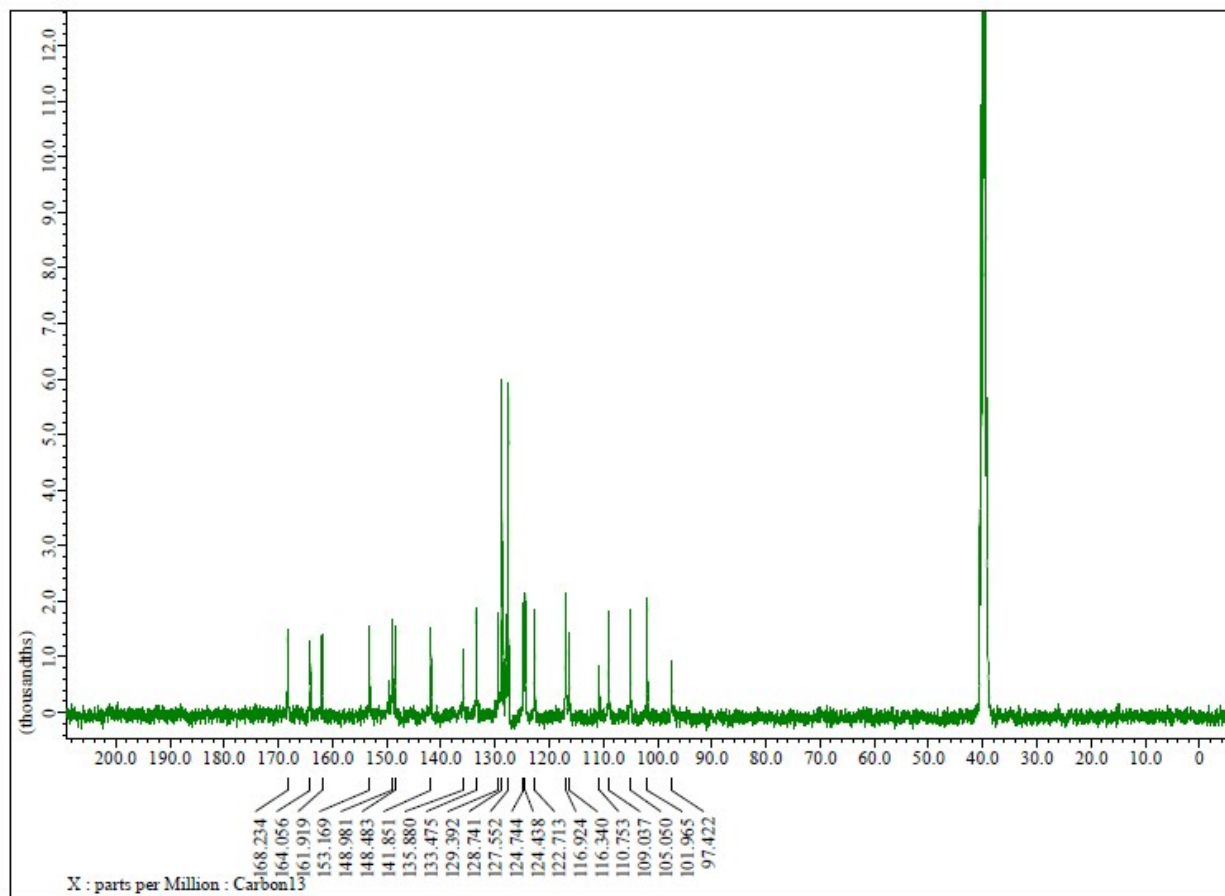

$^1\text{H}$  NMR of **5b**

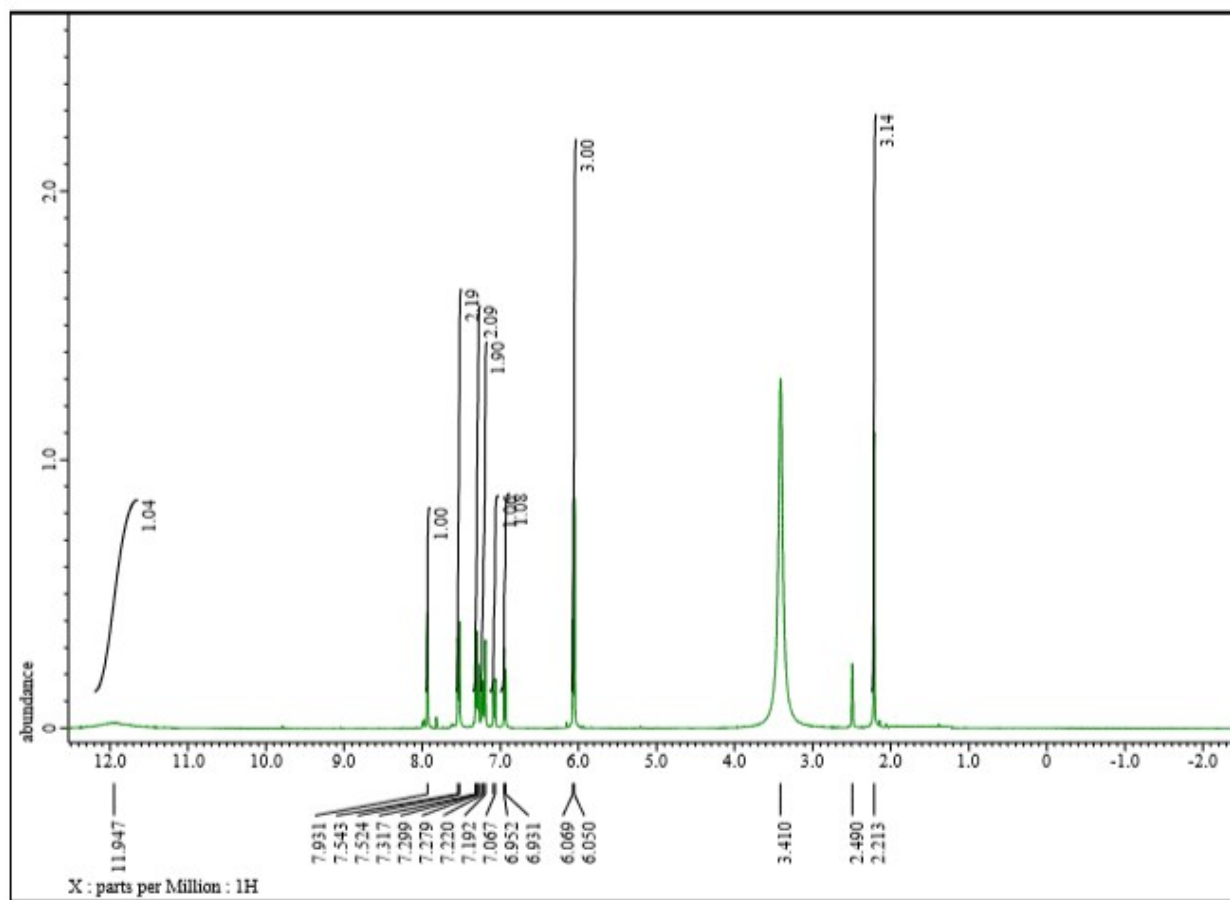

$^{13}\text{C}$  NMR of **5b**

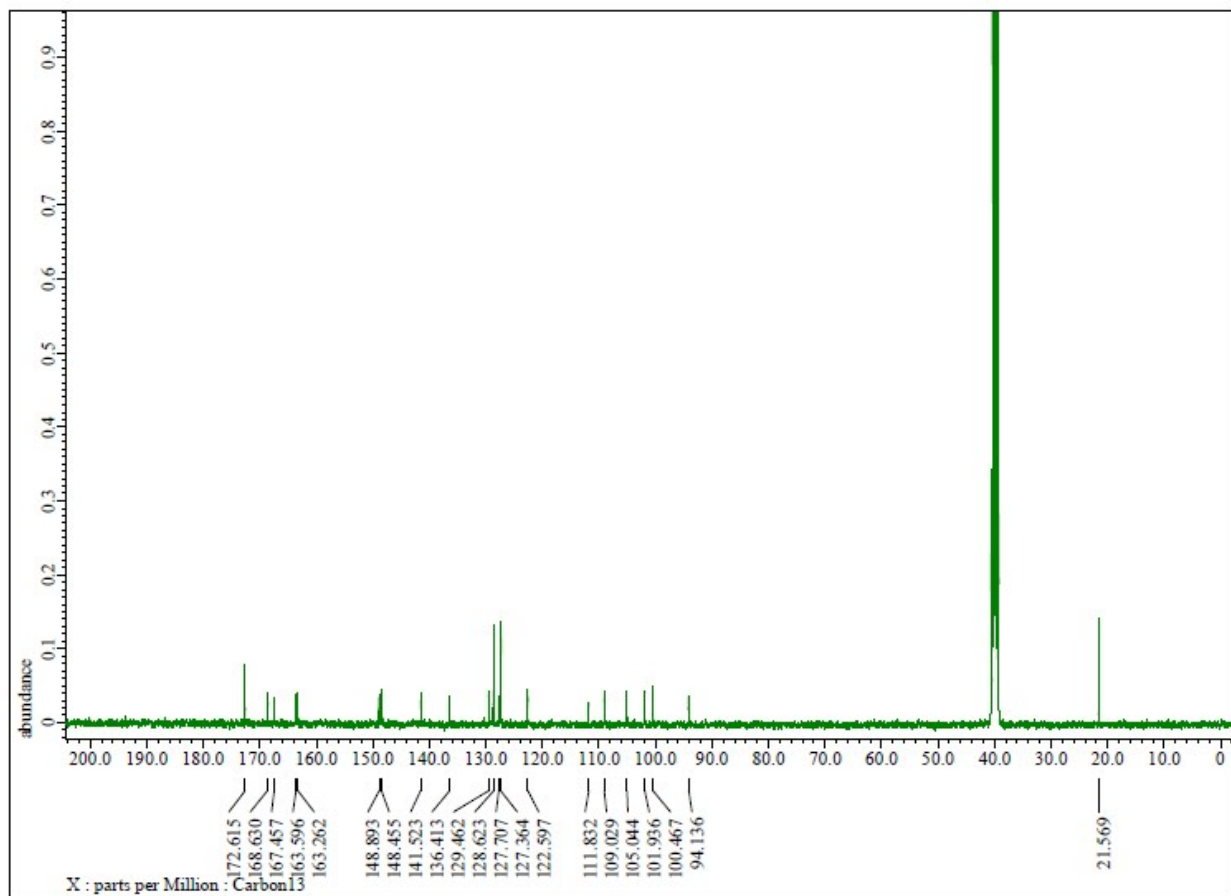

$^1\text{H}$  NMR of 5c

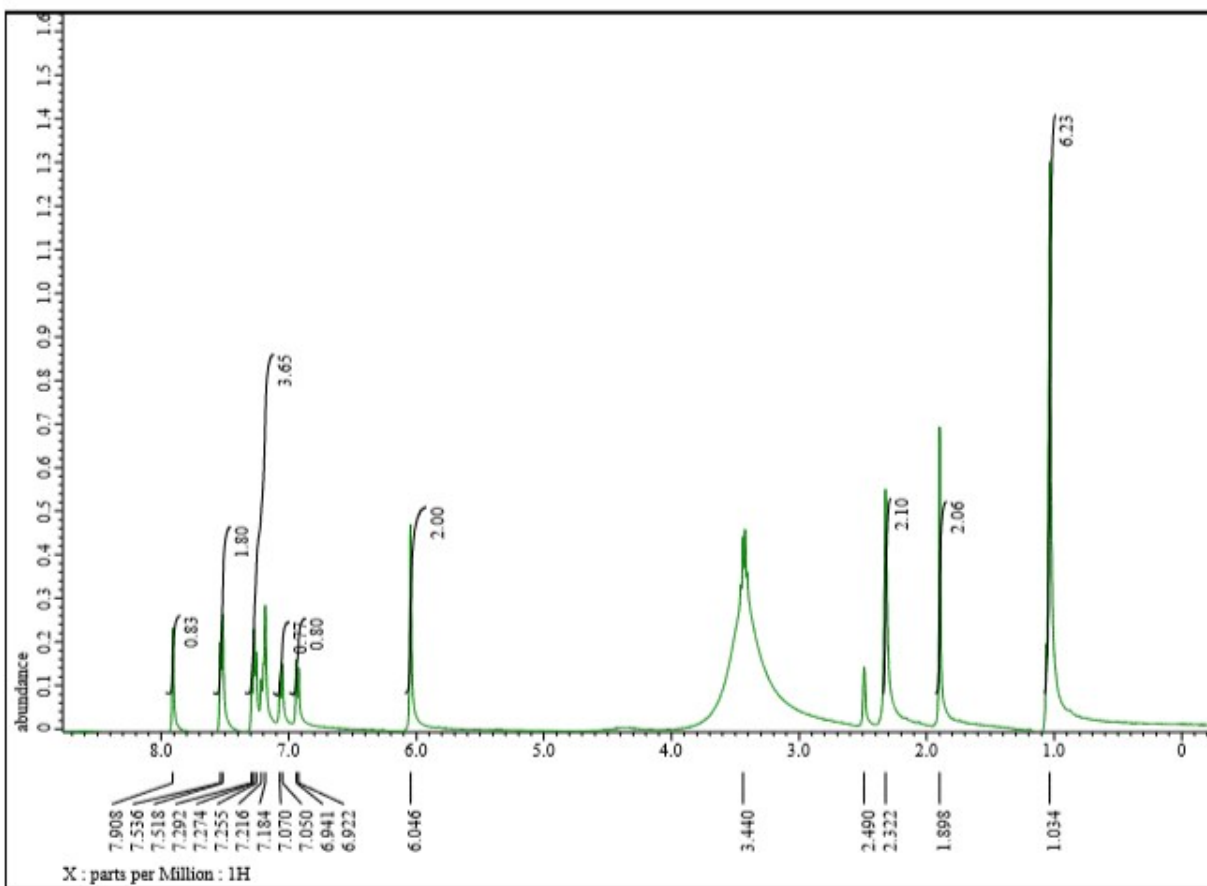

$^{13}\text{C}$  NMR of **5c**

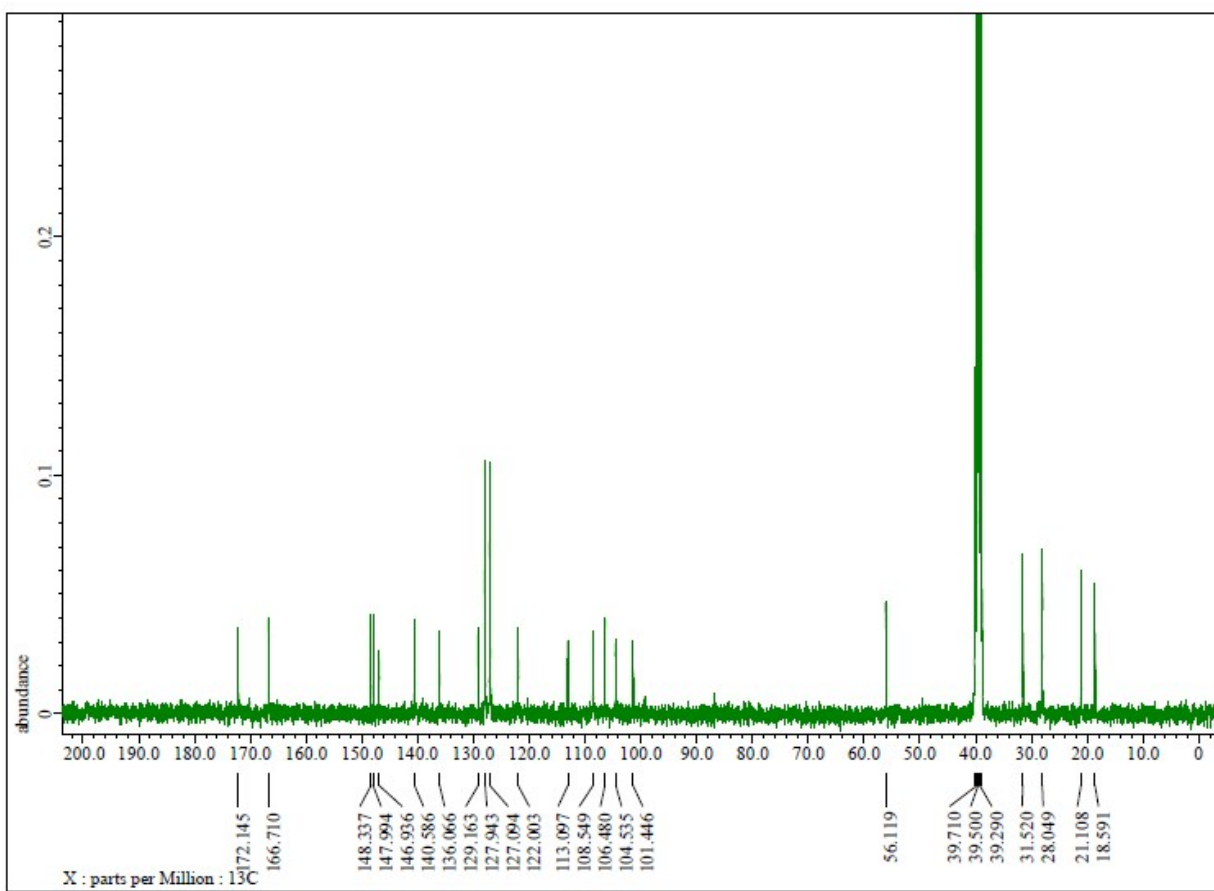

$^1\text{H}$  NMR of **5d**

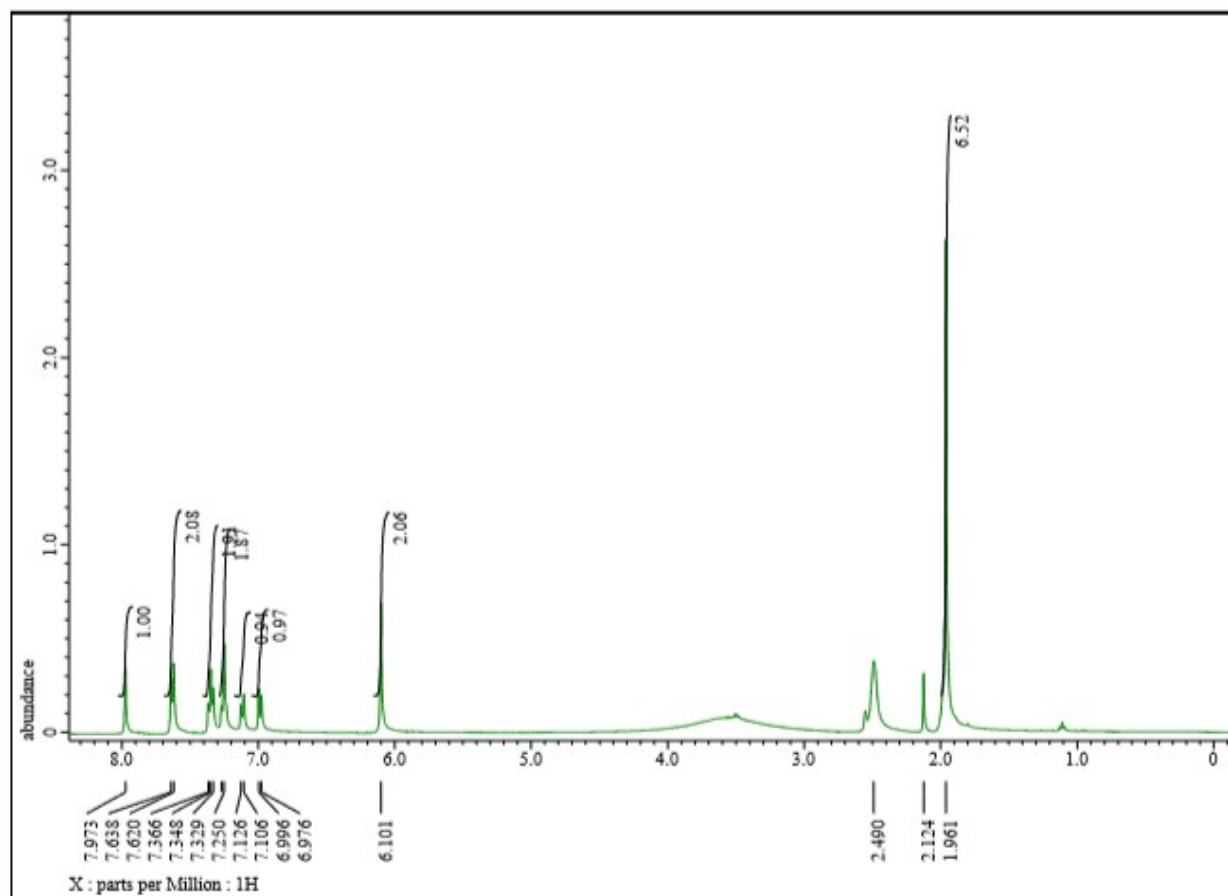

$^{13}\text{C}$  NMR of **5d**

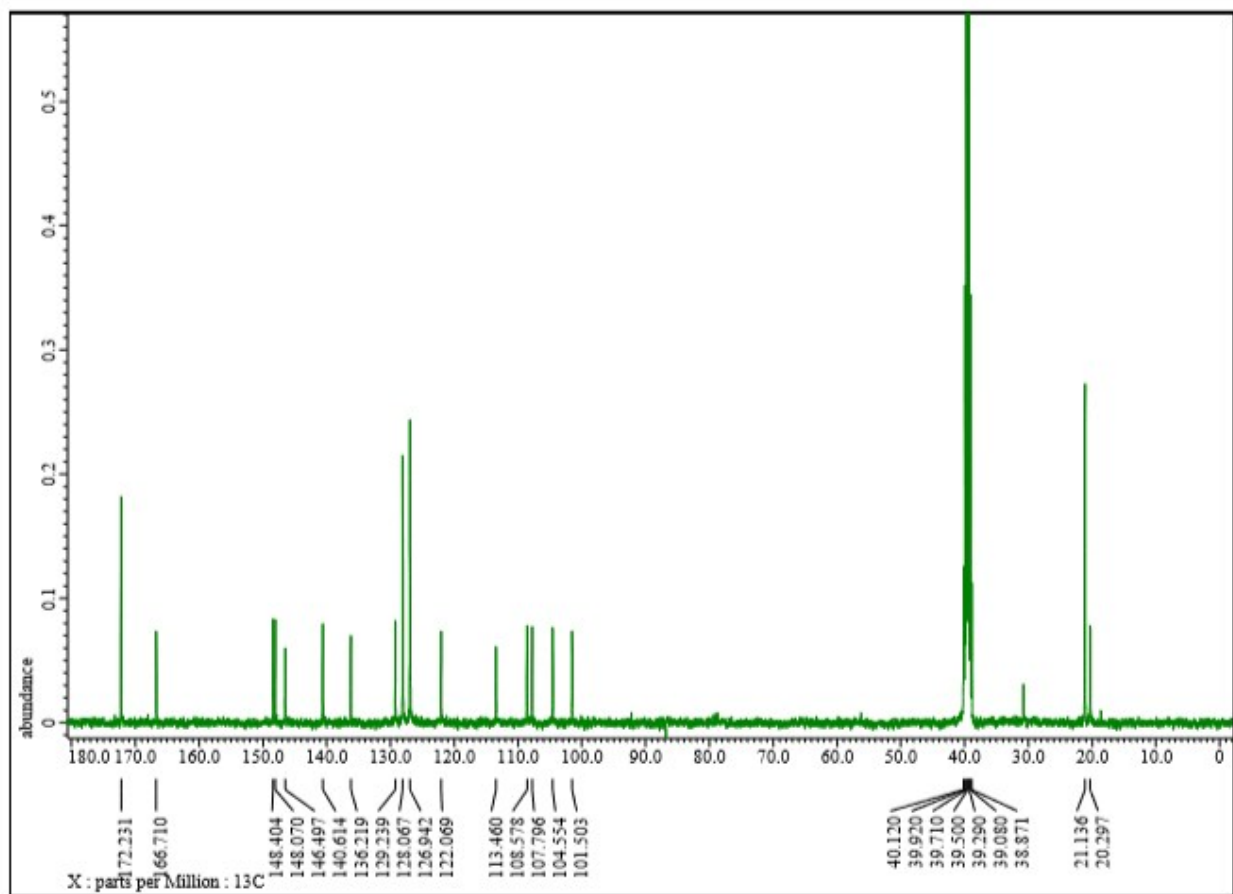



$^1\text{H}$  NMR of 5e

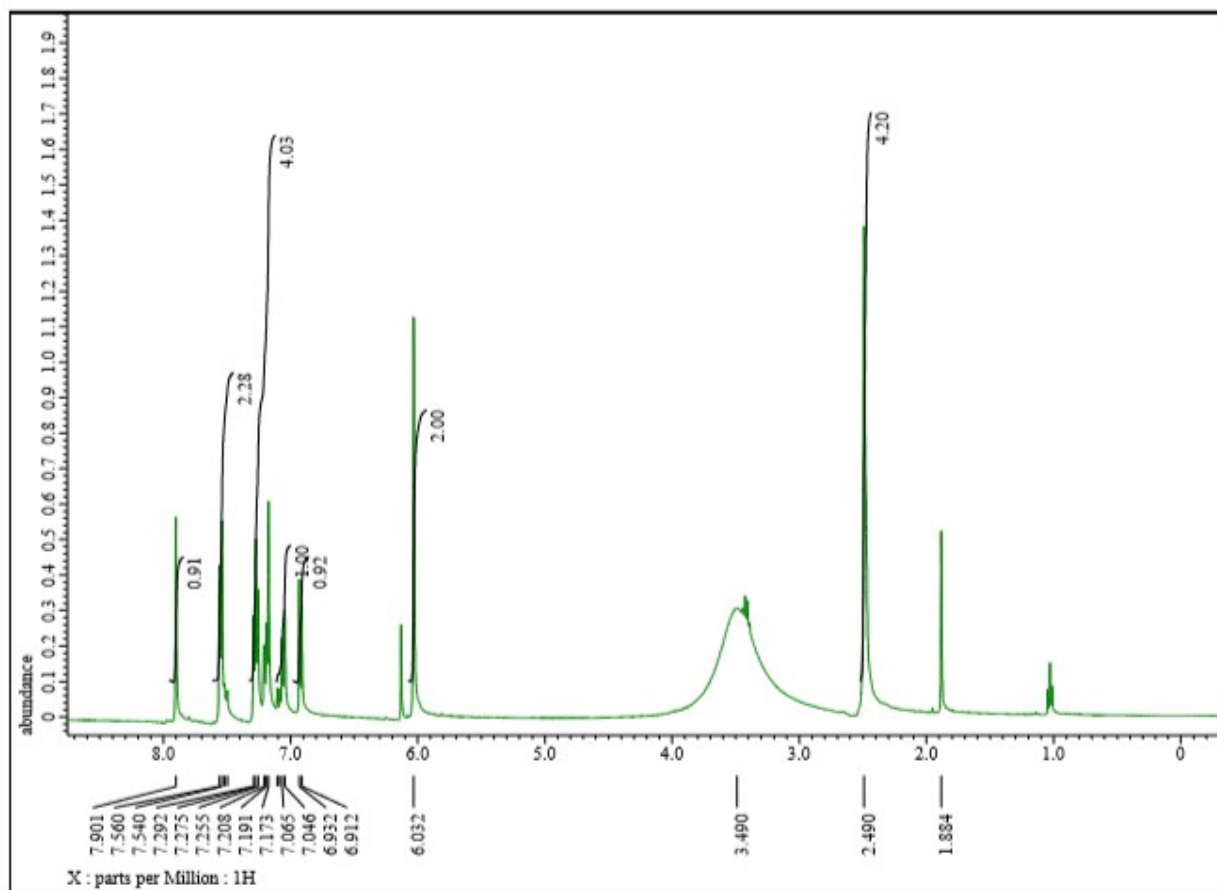

$^{13}\text{C}$  NMR of **5e**

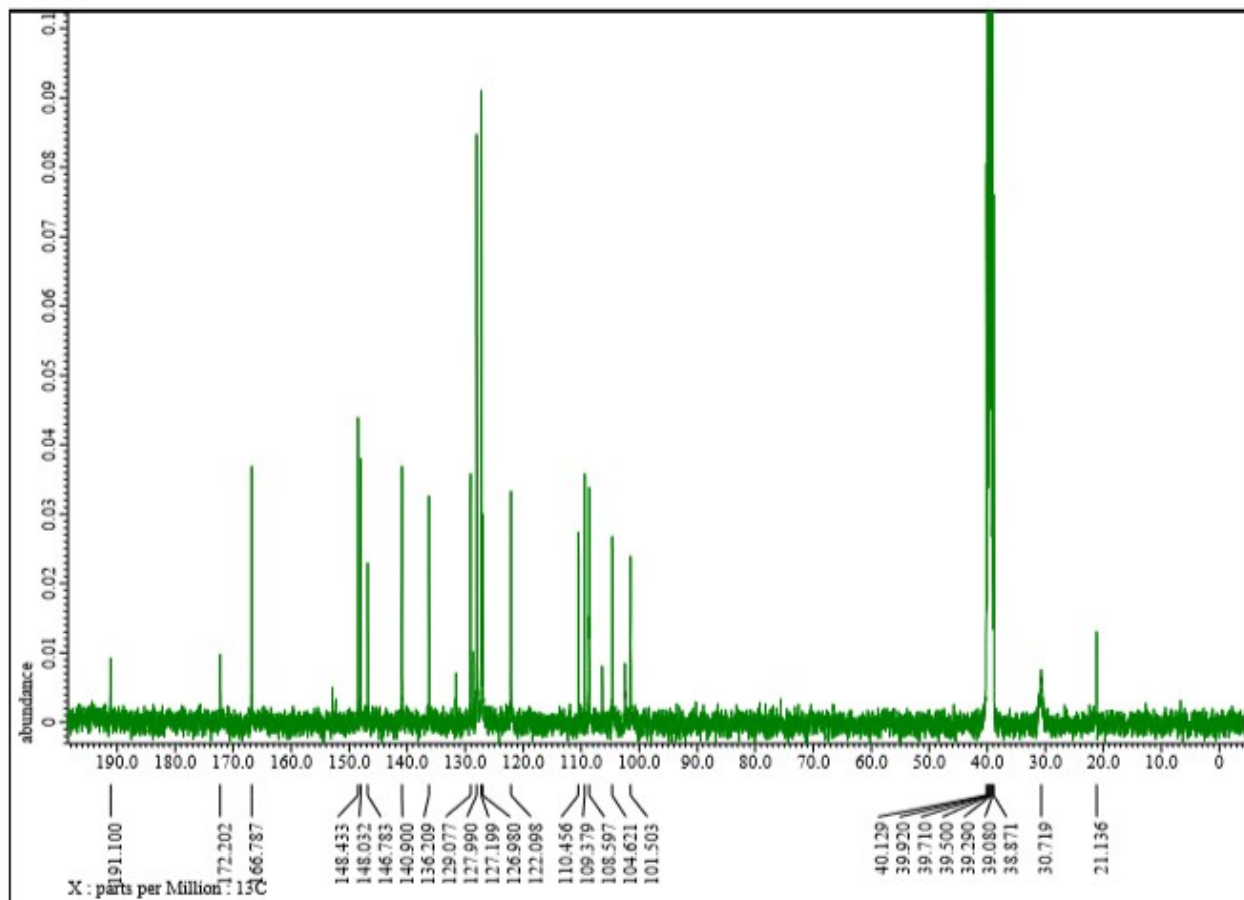

$^1\text{H}$  NMR of **5f**

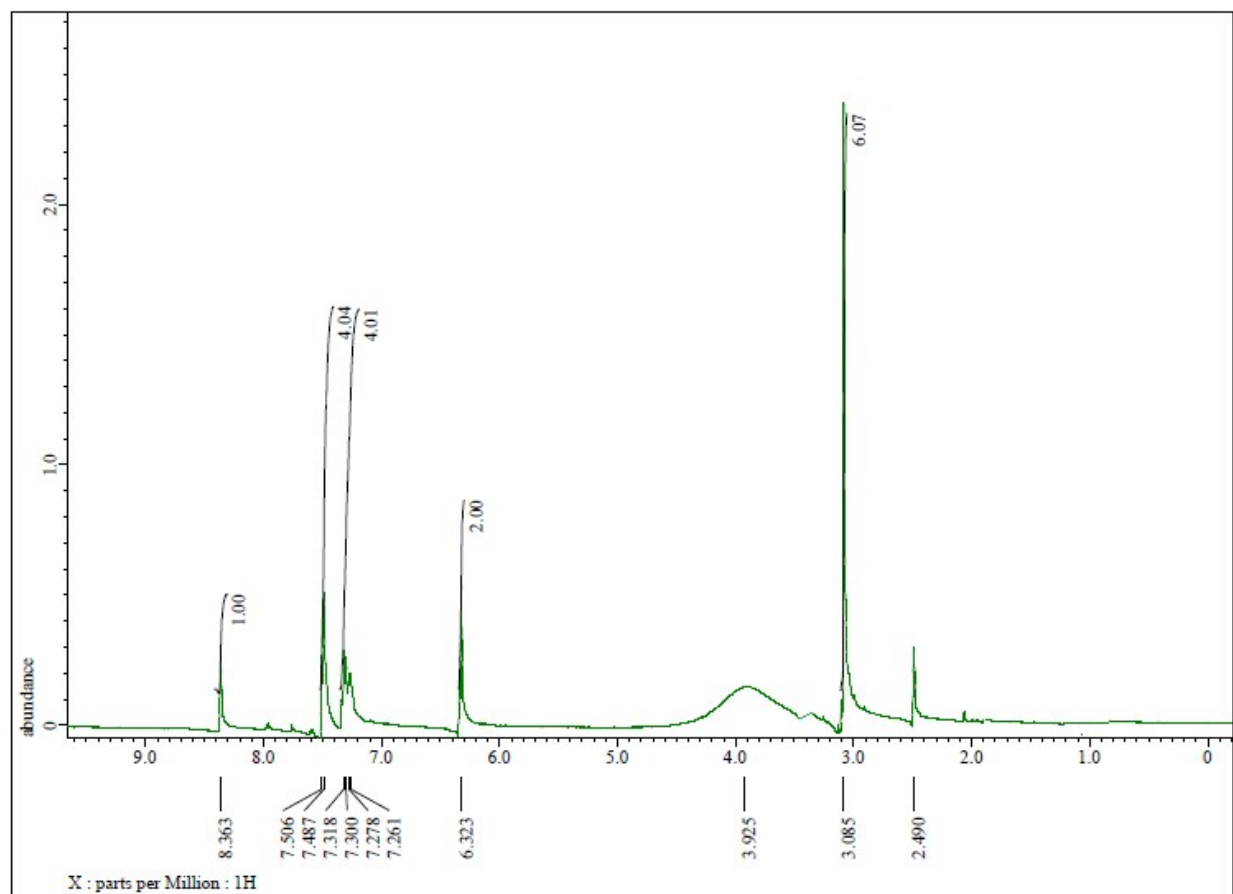

$^{13}\text{C}$  NMR of **5f**

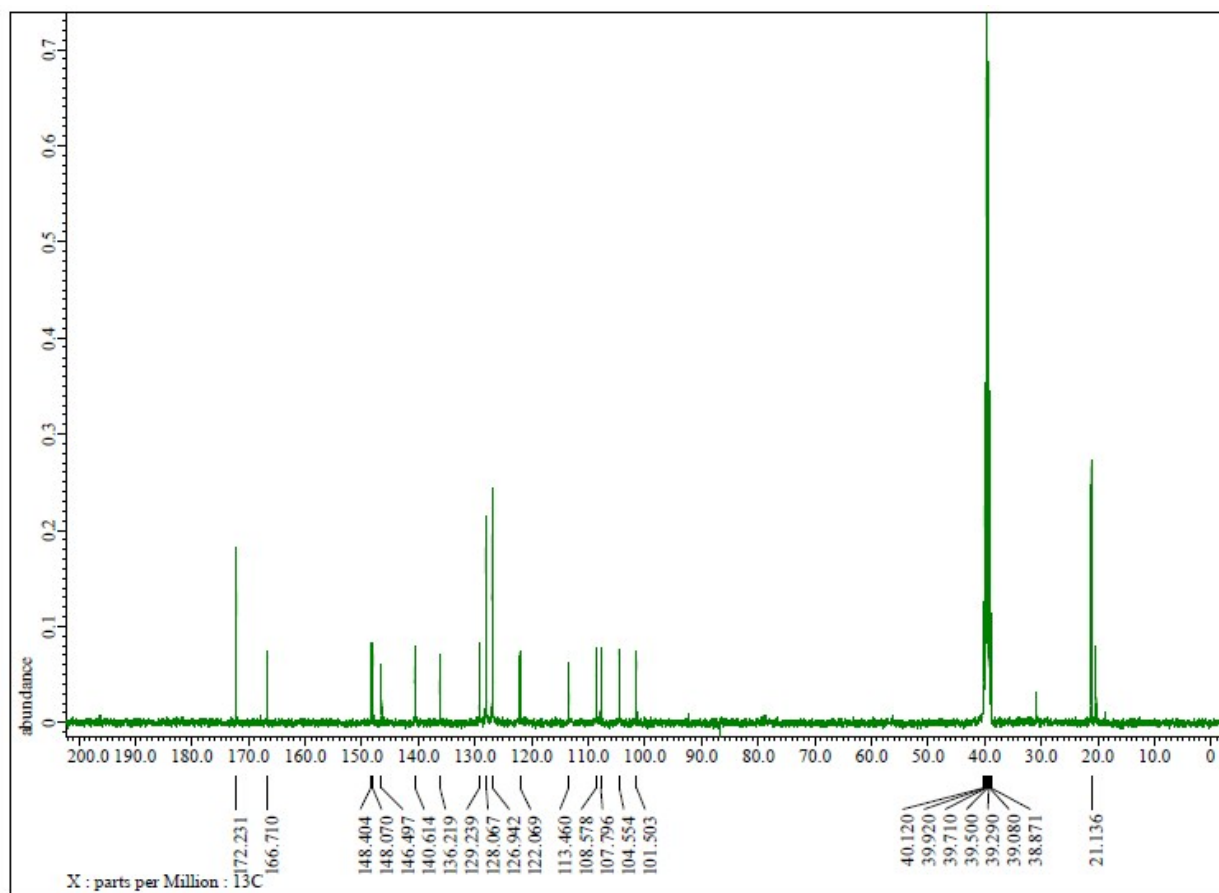

$^1\text{H}$  NMR of 5g

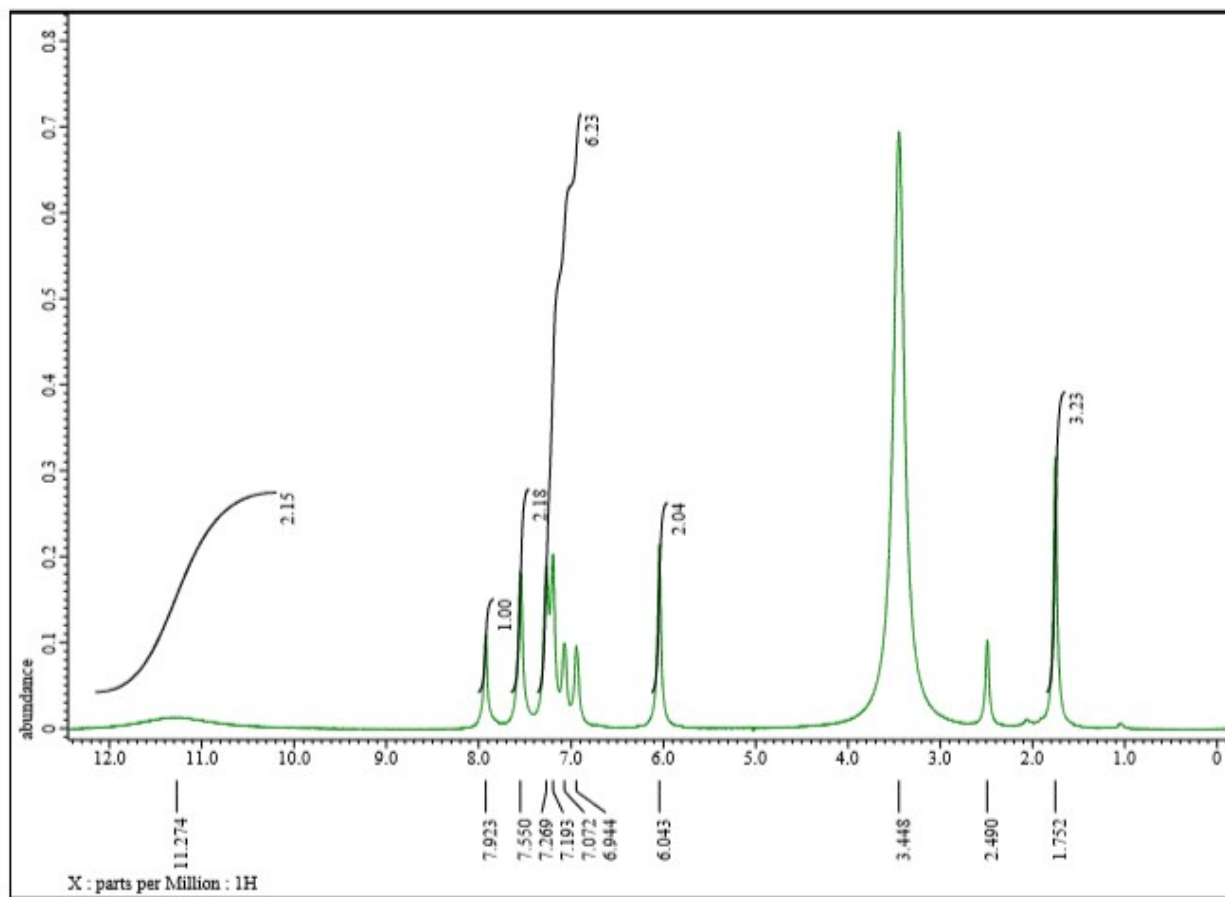

$^{13}\text{C}$  NMR of **5g**

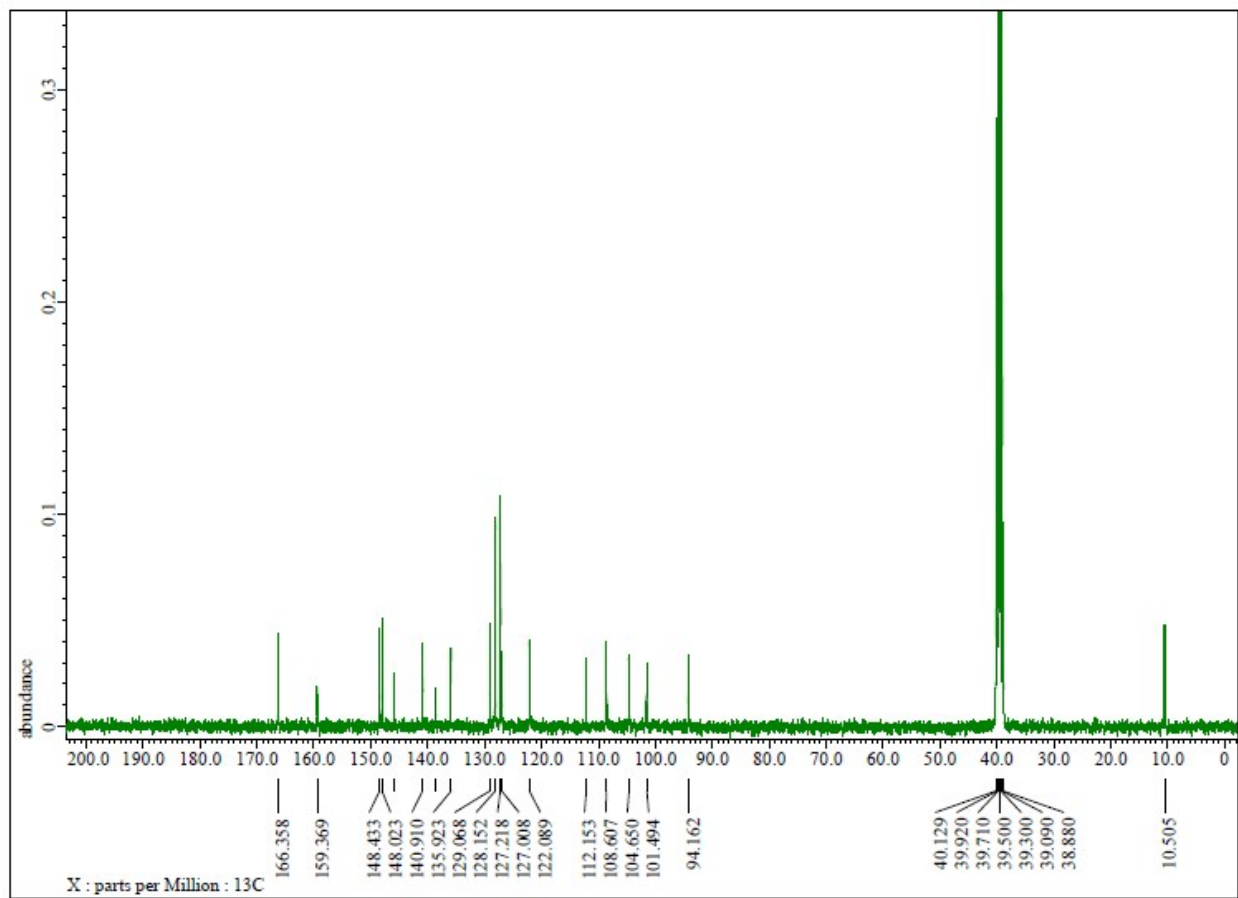

$^1\text{H}$  NMR of **5h**

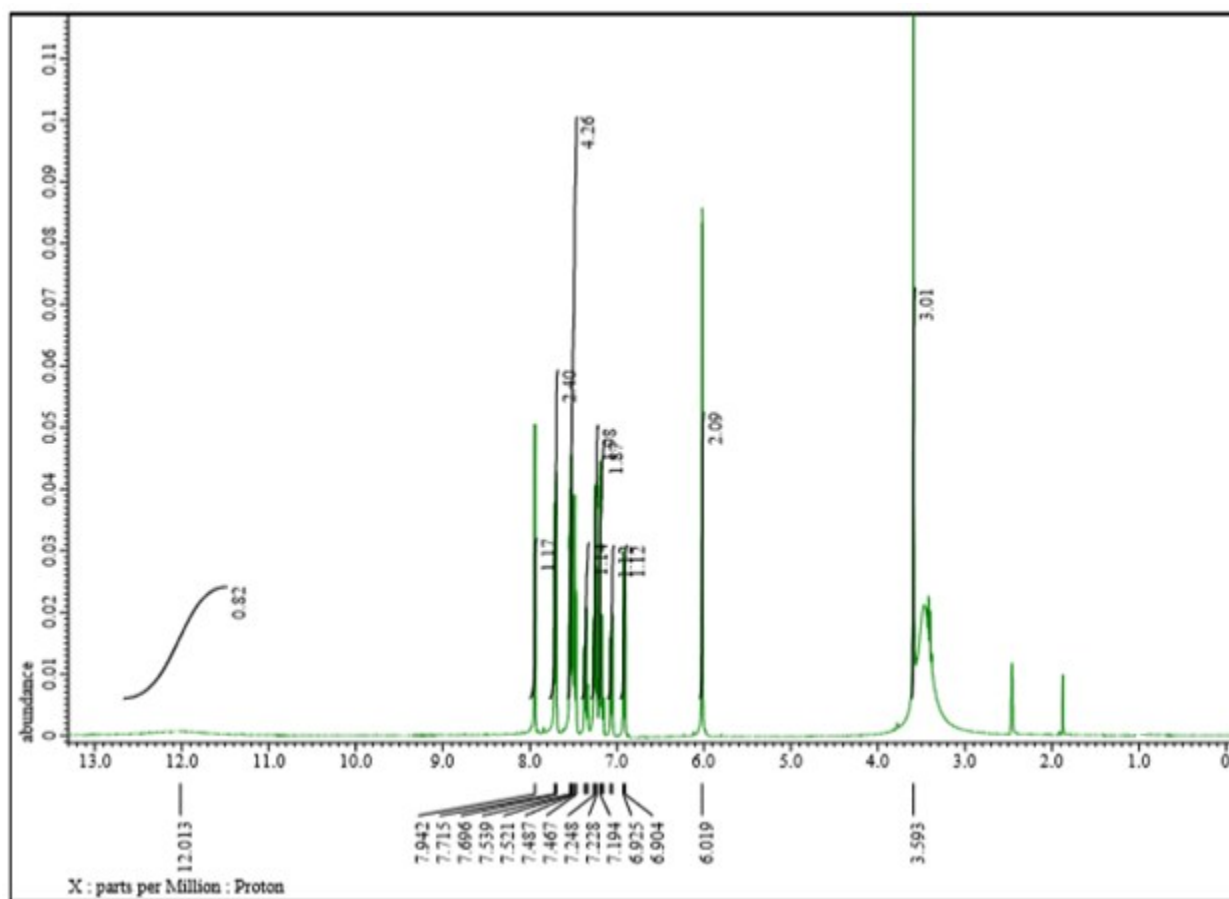

$^{13}\text{C}$  NMR of **5h**

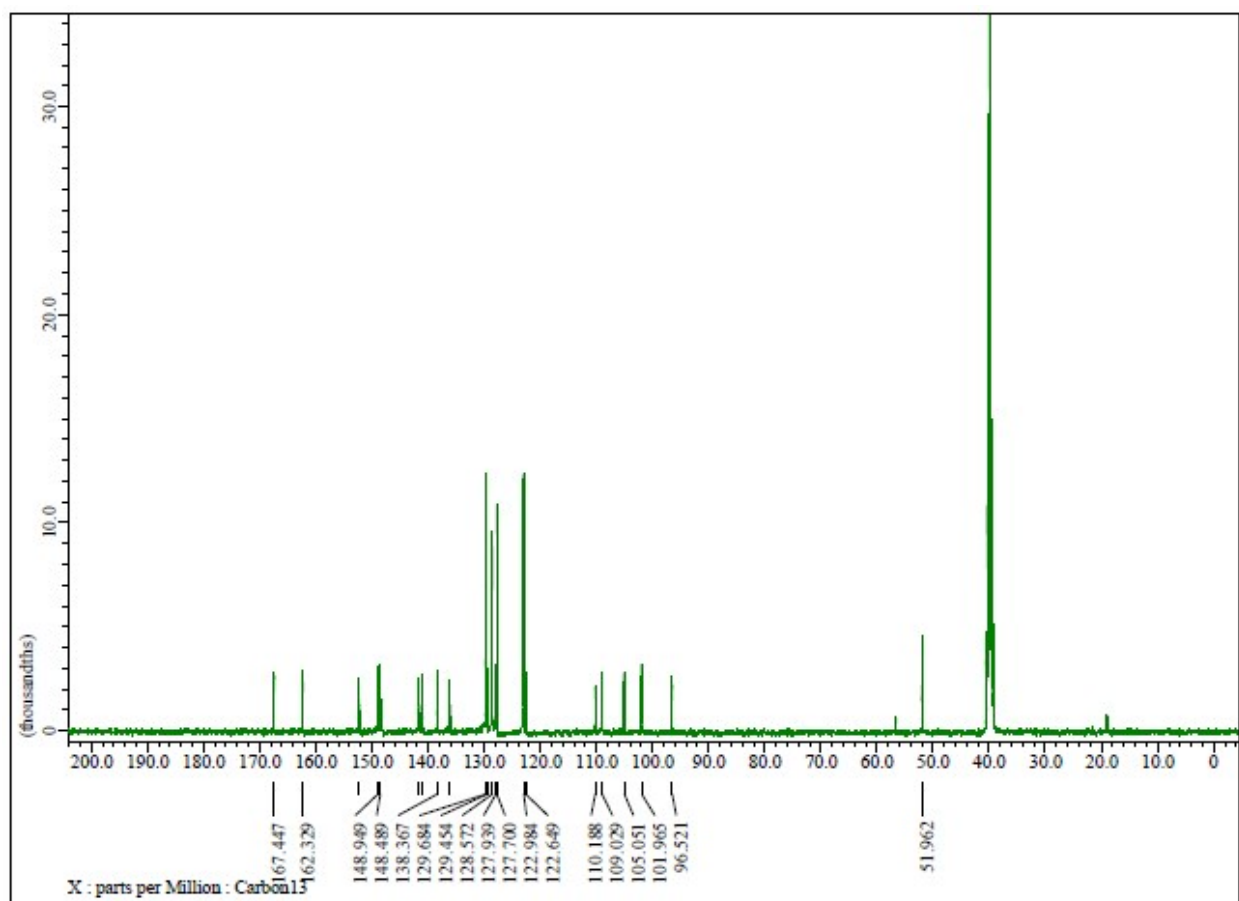



$^1\text{H}$  NMR of **5i**

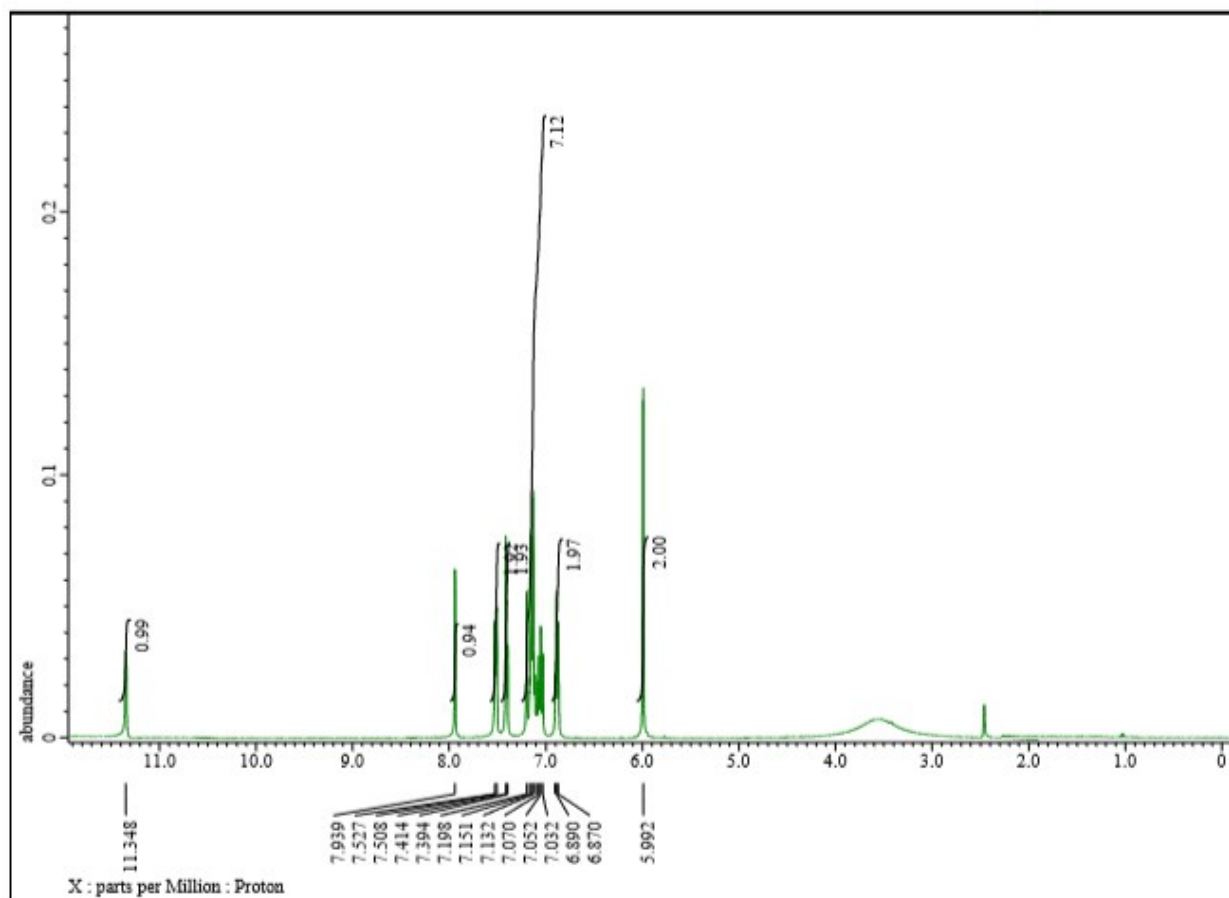

$^{13}\text{C}$  NMR of **5i**

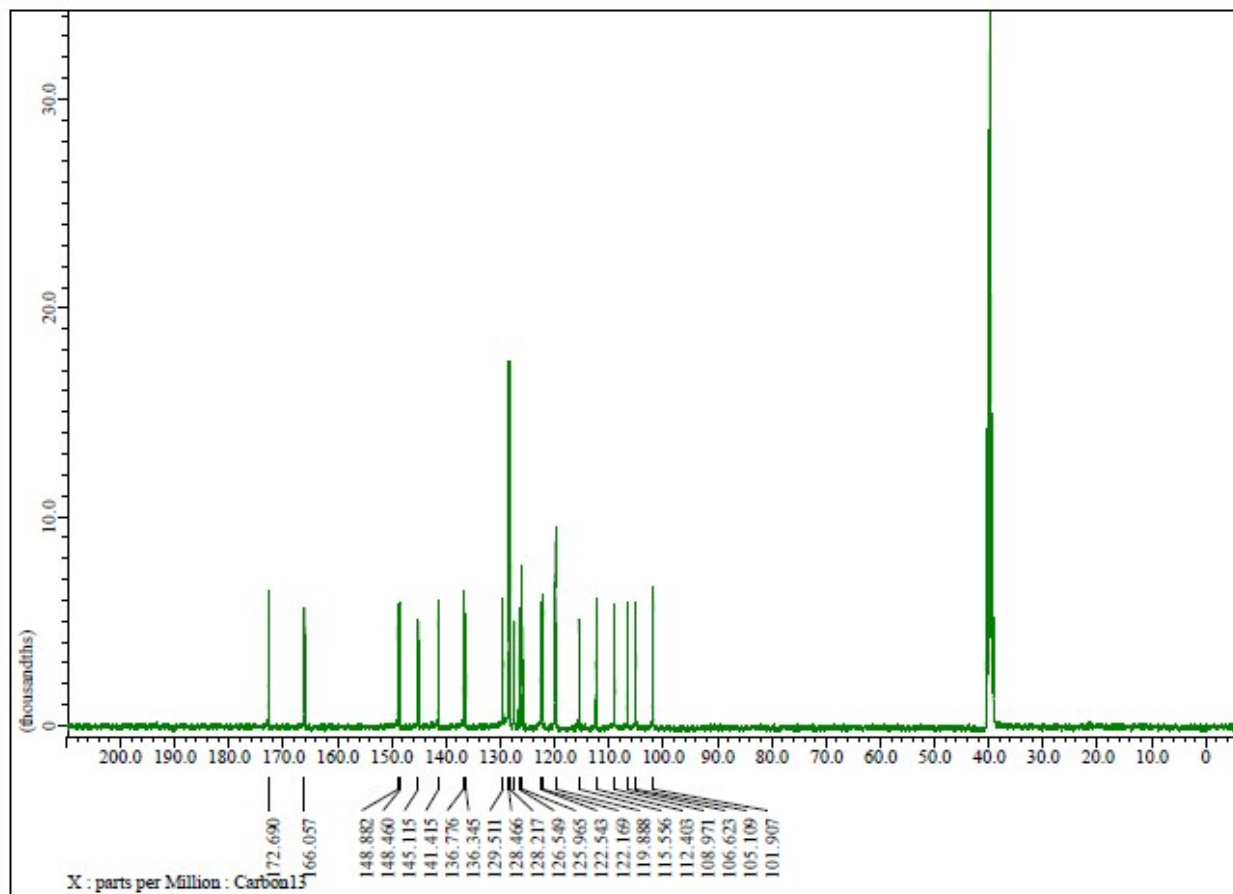

<sup>1</sup>H NMR of 5j

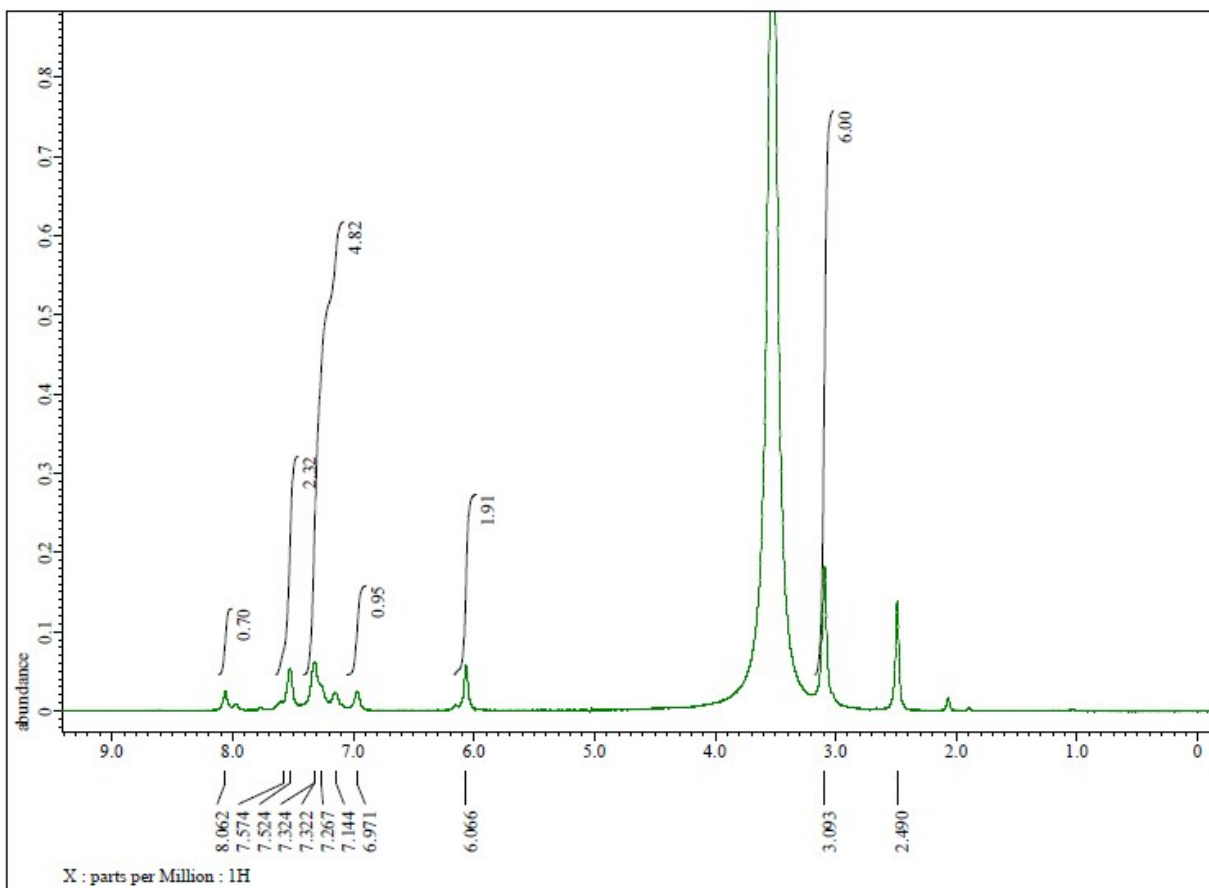

$^{13}\text{C}$  NMR of **5j**

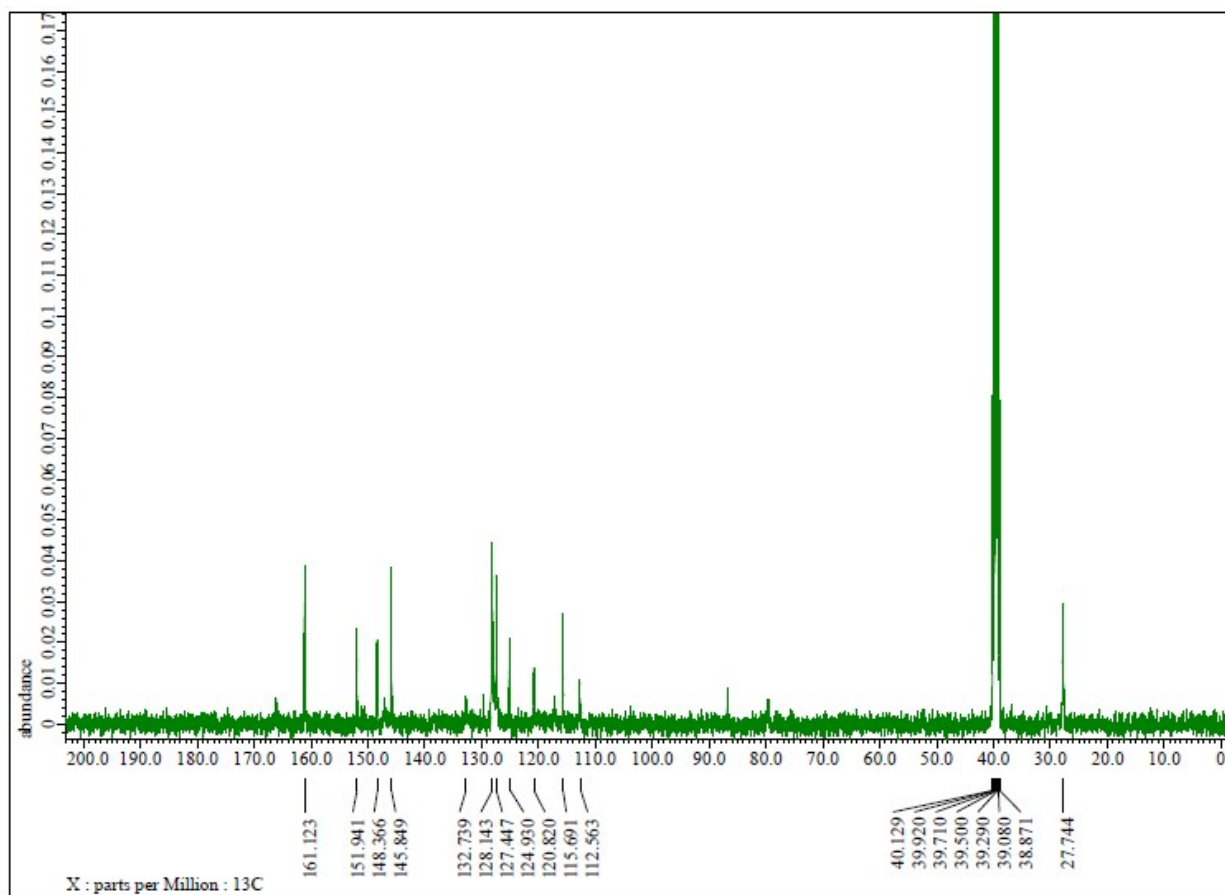

# $^1\text{H}$ NMR of **5k**

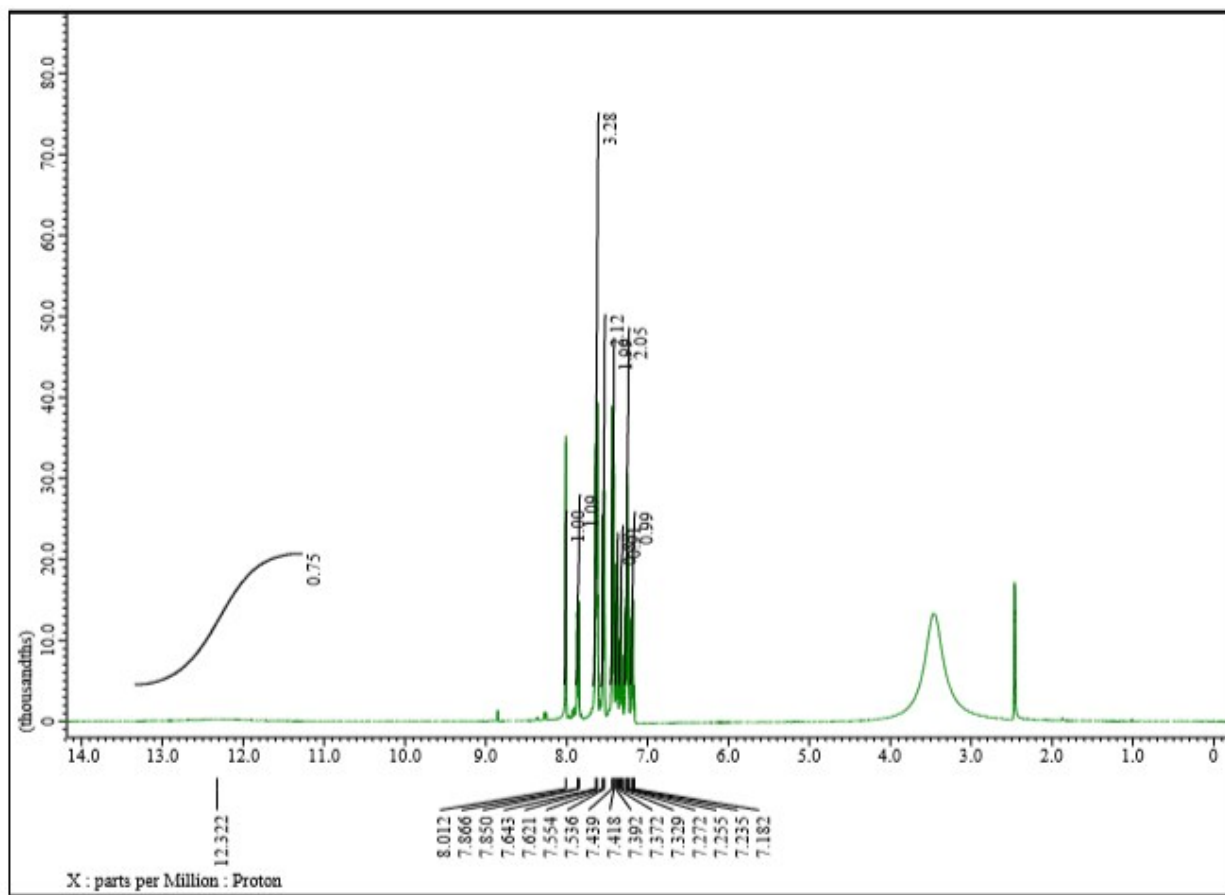

$^{13}\text{C}$  NMR of **5k**

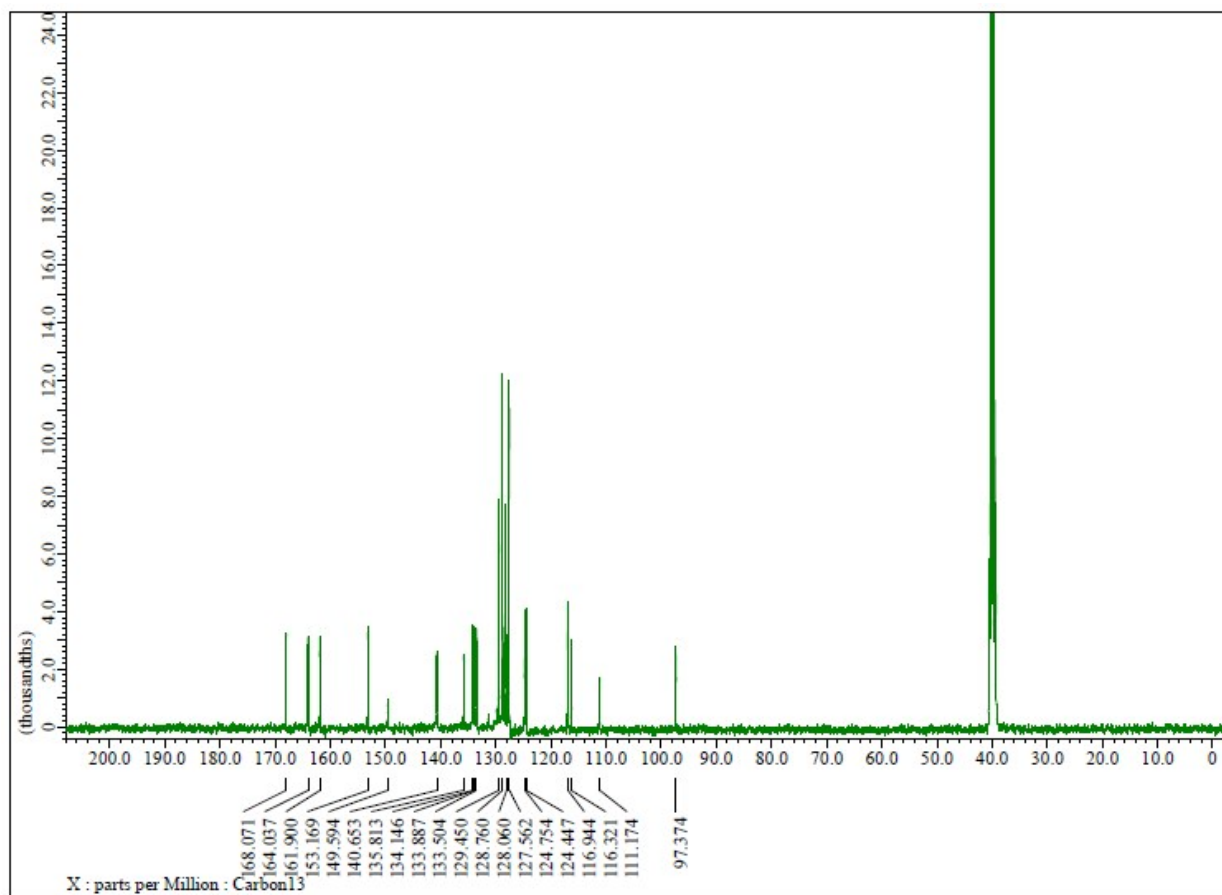

<sup>1</sup>H NMR of 51

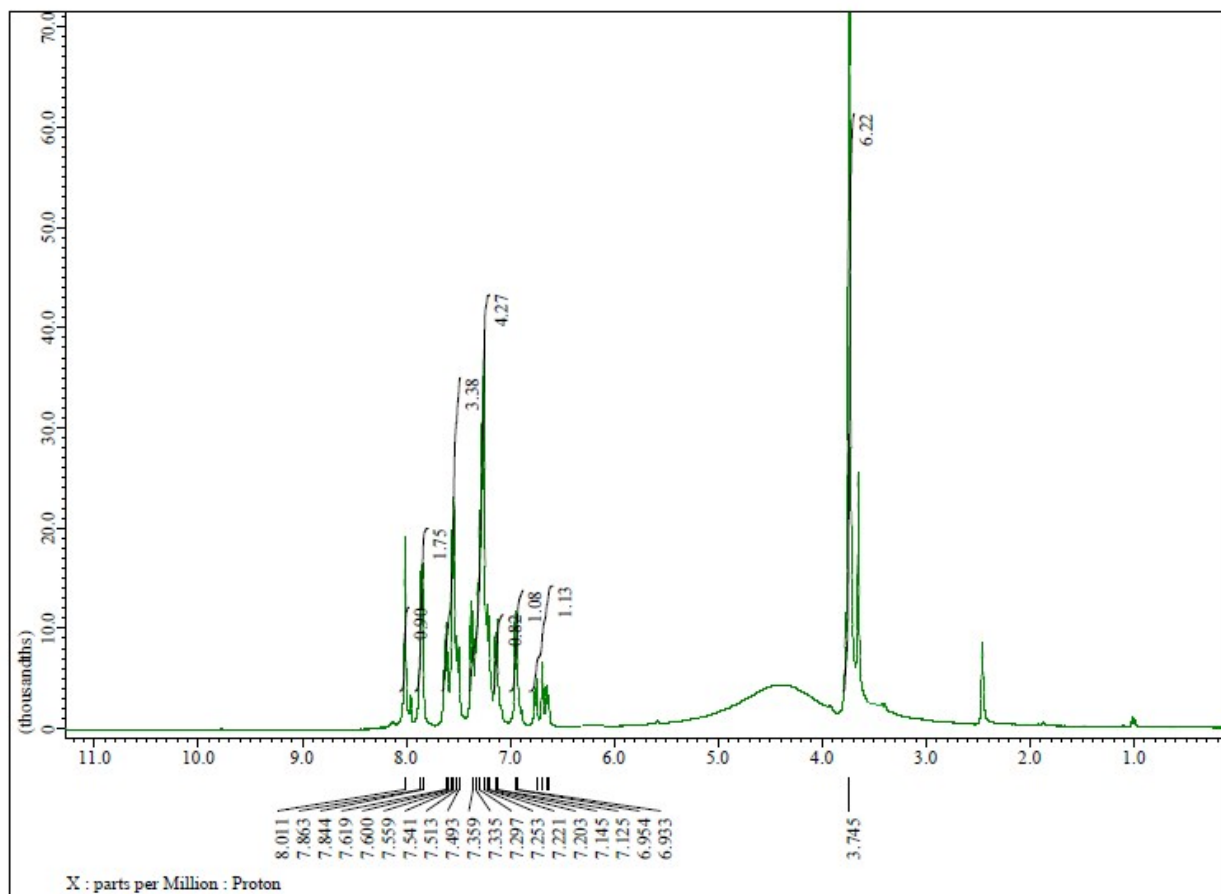

$^{13}\text{C}$  NMR of **51**

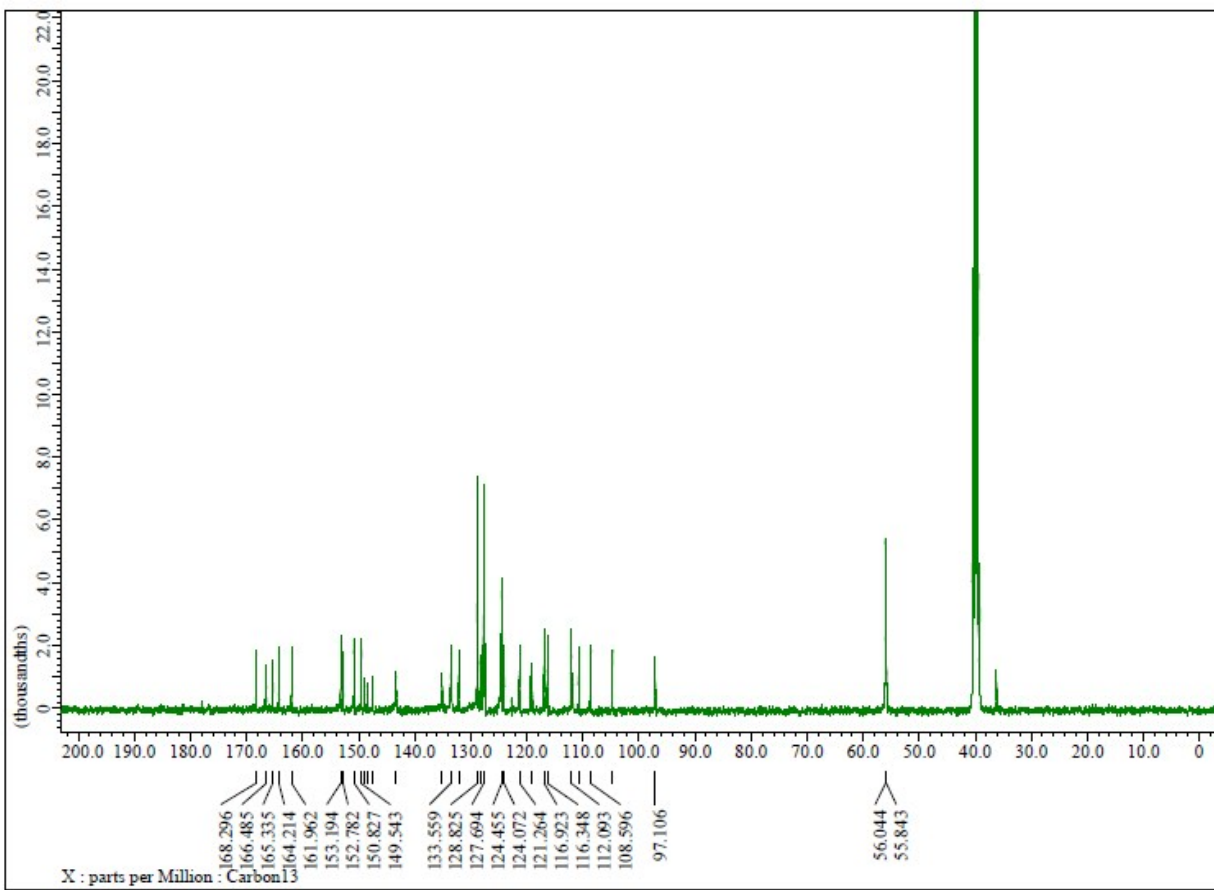



$^1\text{H}$  NMR of 5m

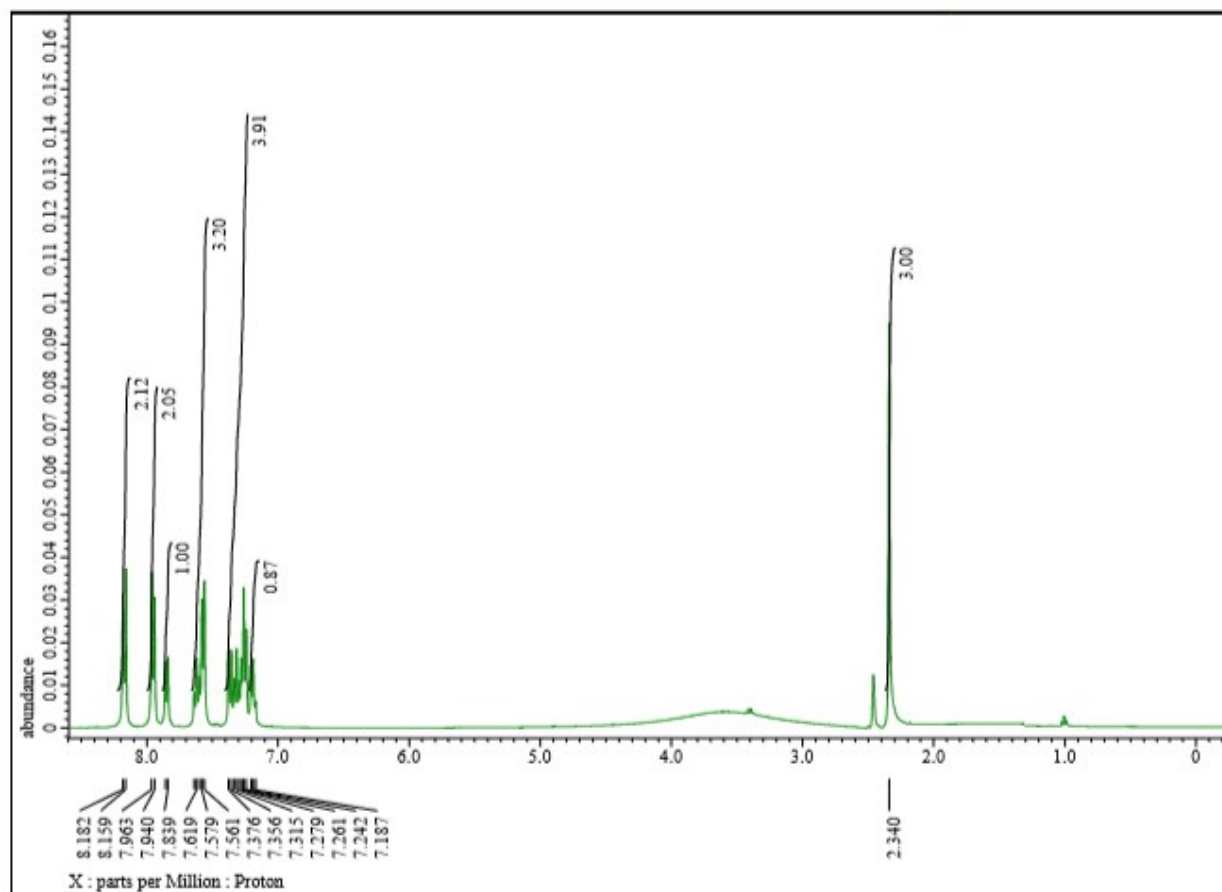

$^{13}\text{C}$  NMR of **5m**

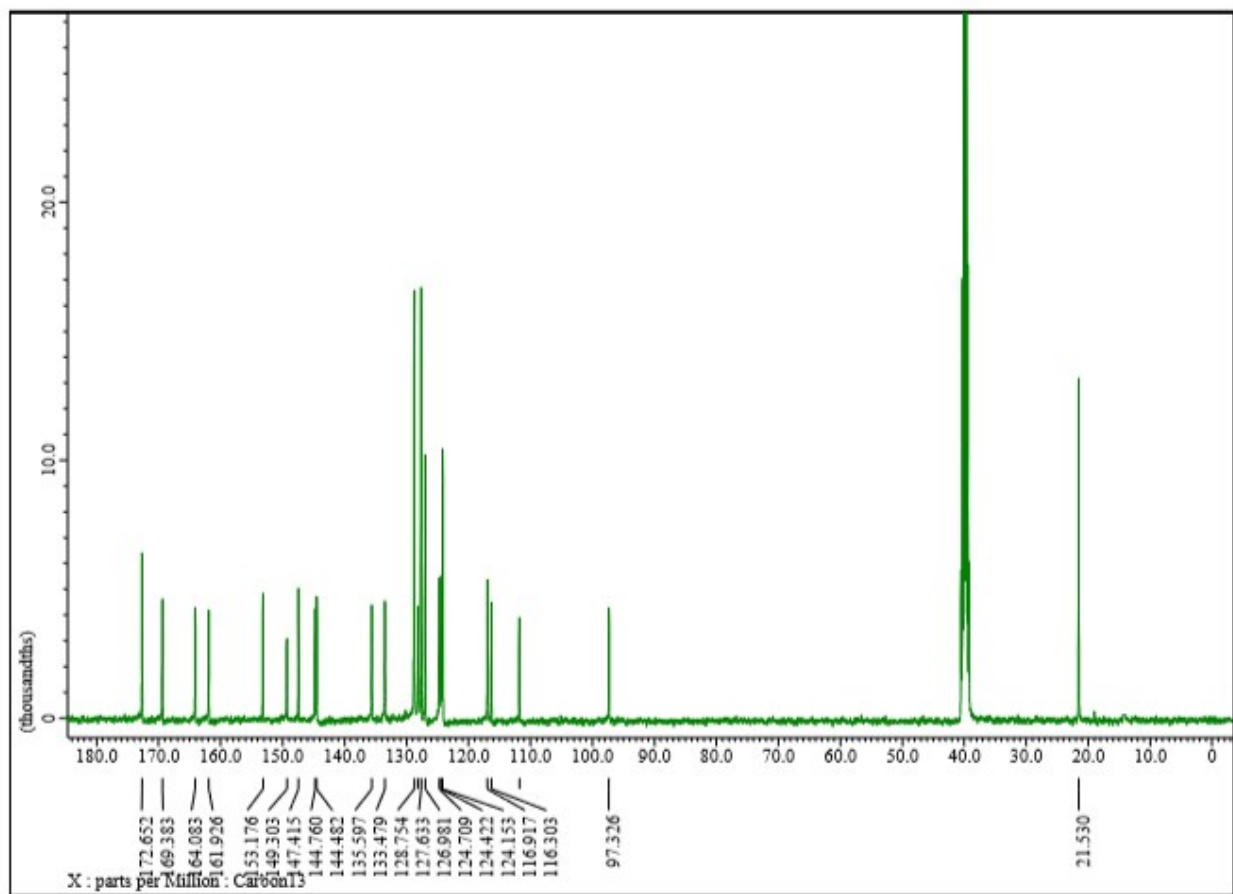

$^1\text{H}$  NMR of **5n**

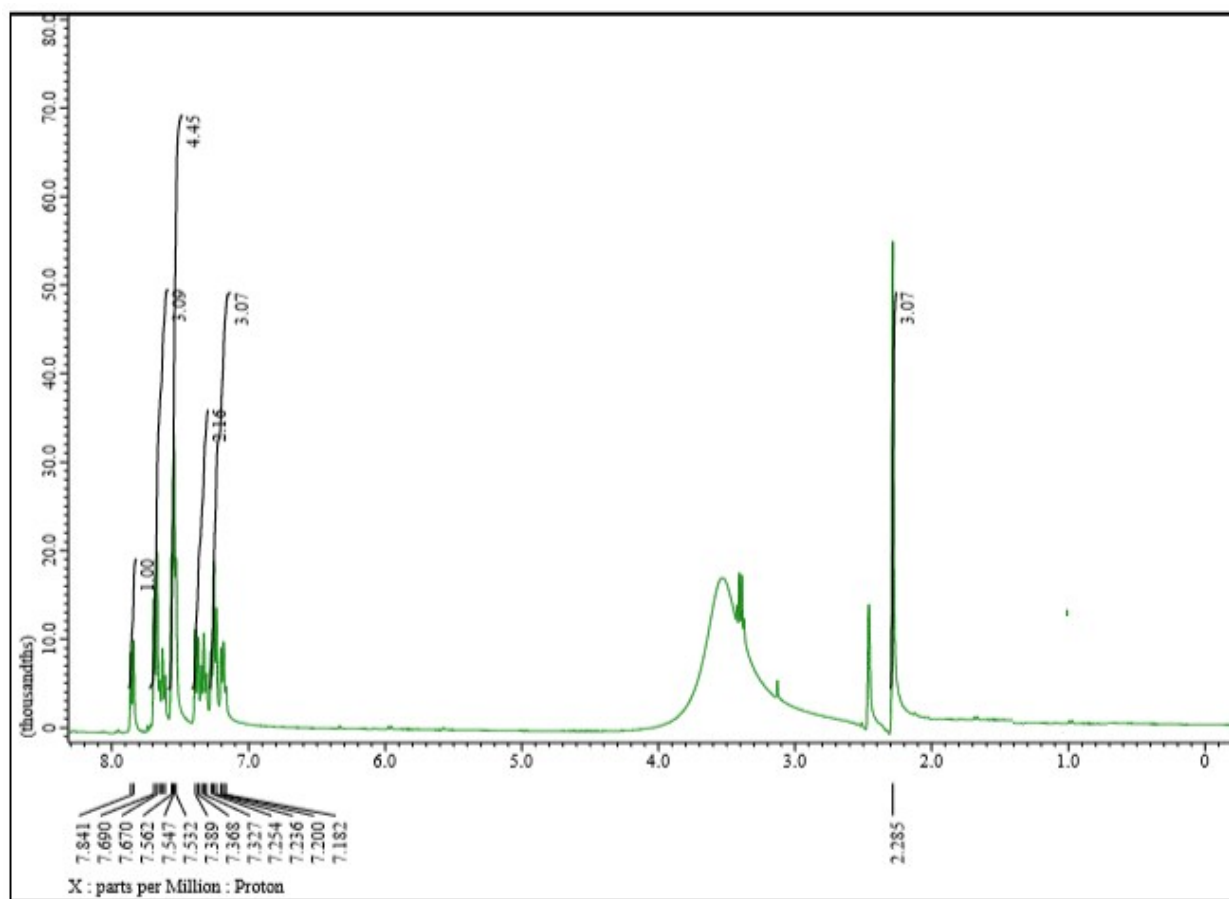

$^{13}\text{C}$  NMR of **5n**

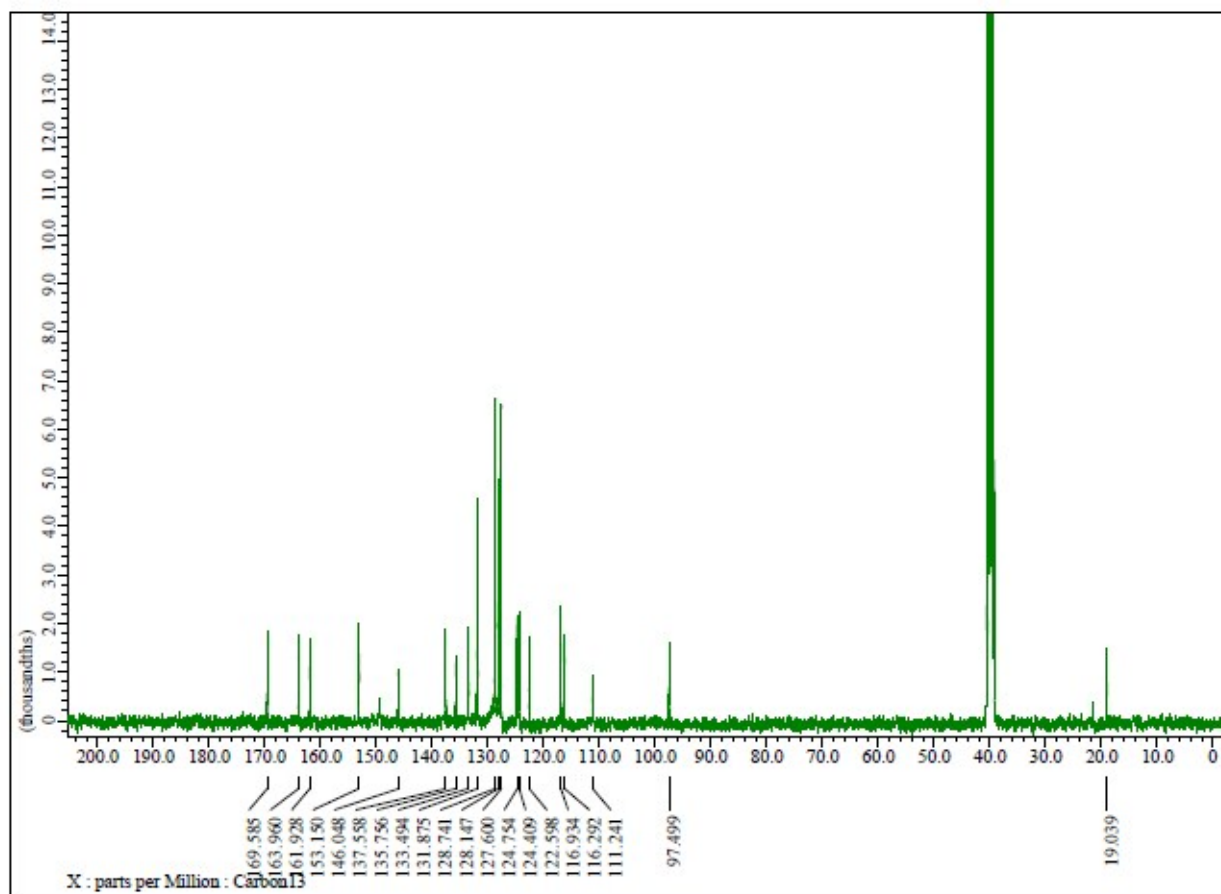

$^1\text{H}$  NMR of **5o**

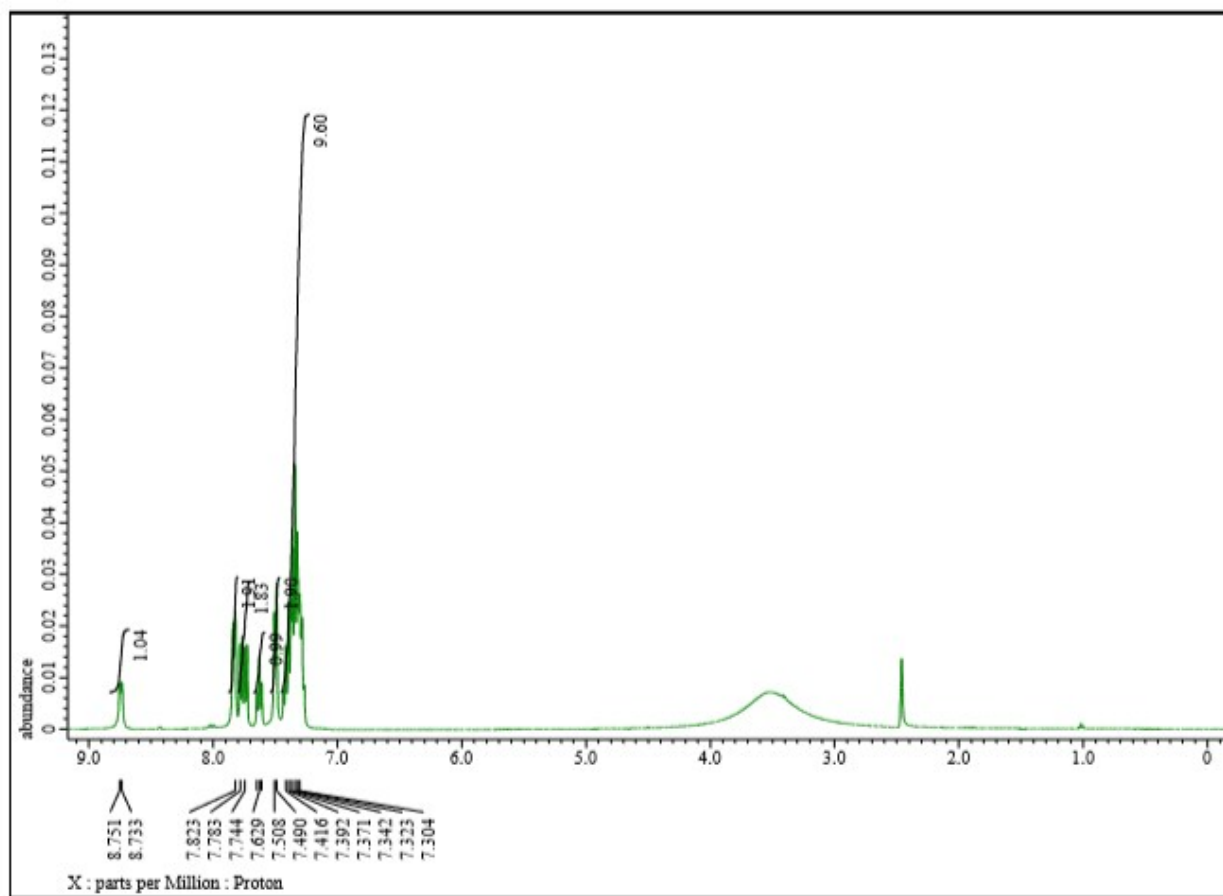

$^{13}\text{C}$  NMR of **5o**

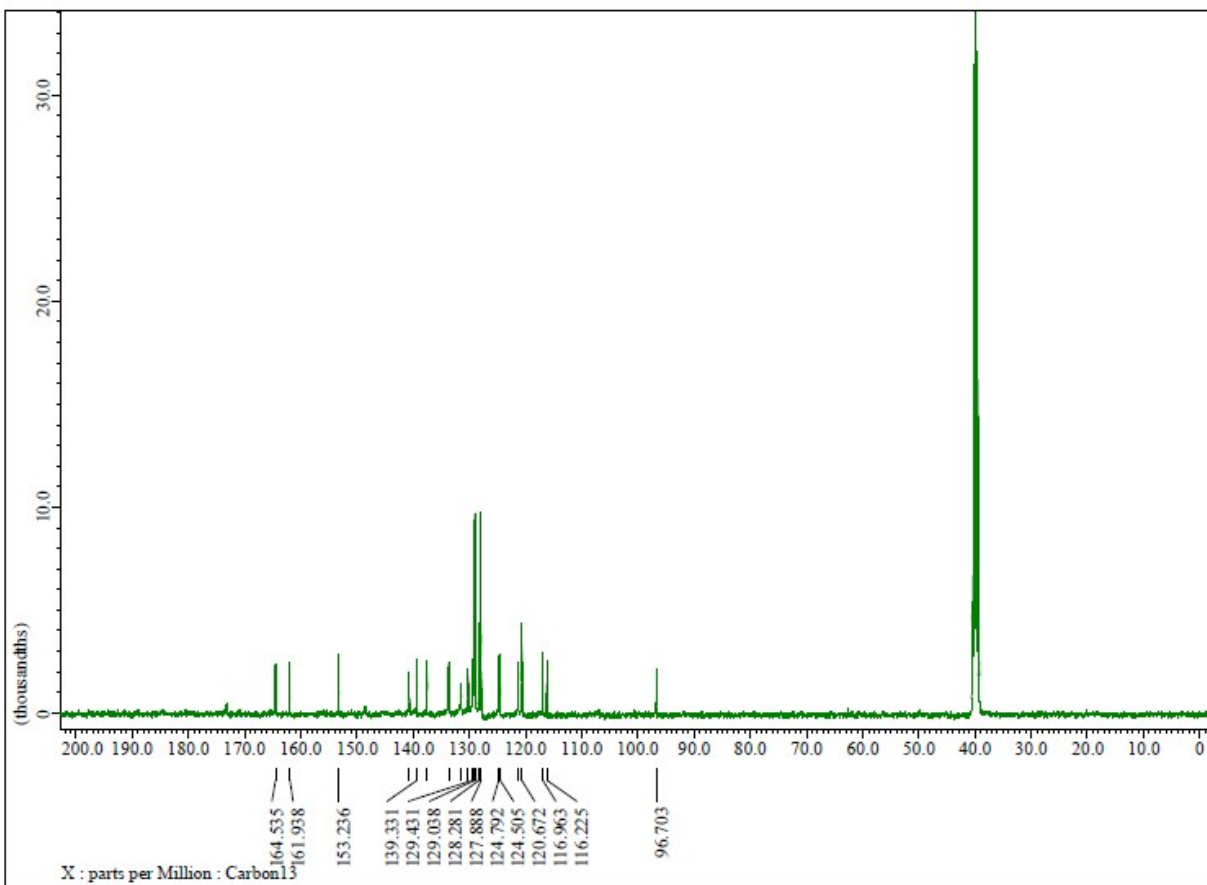

# $^1\text{H}$ NMR of 5p

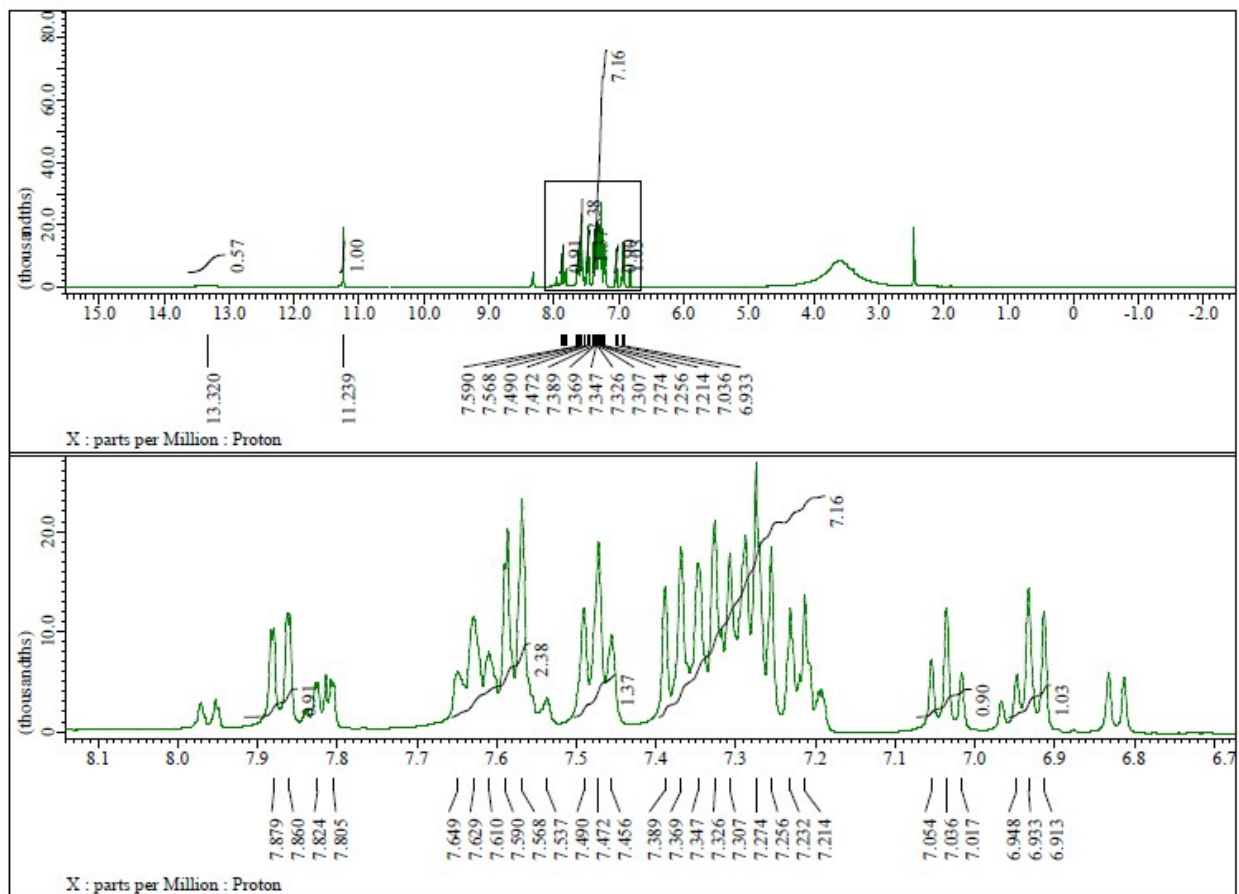

$^{13}\text{C}$  NMR of **5p**

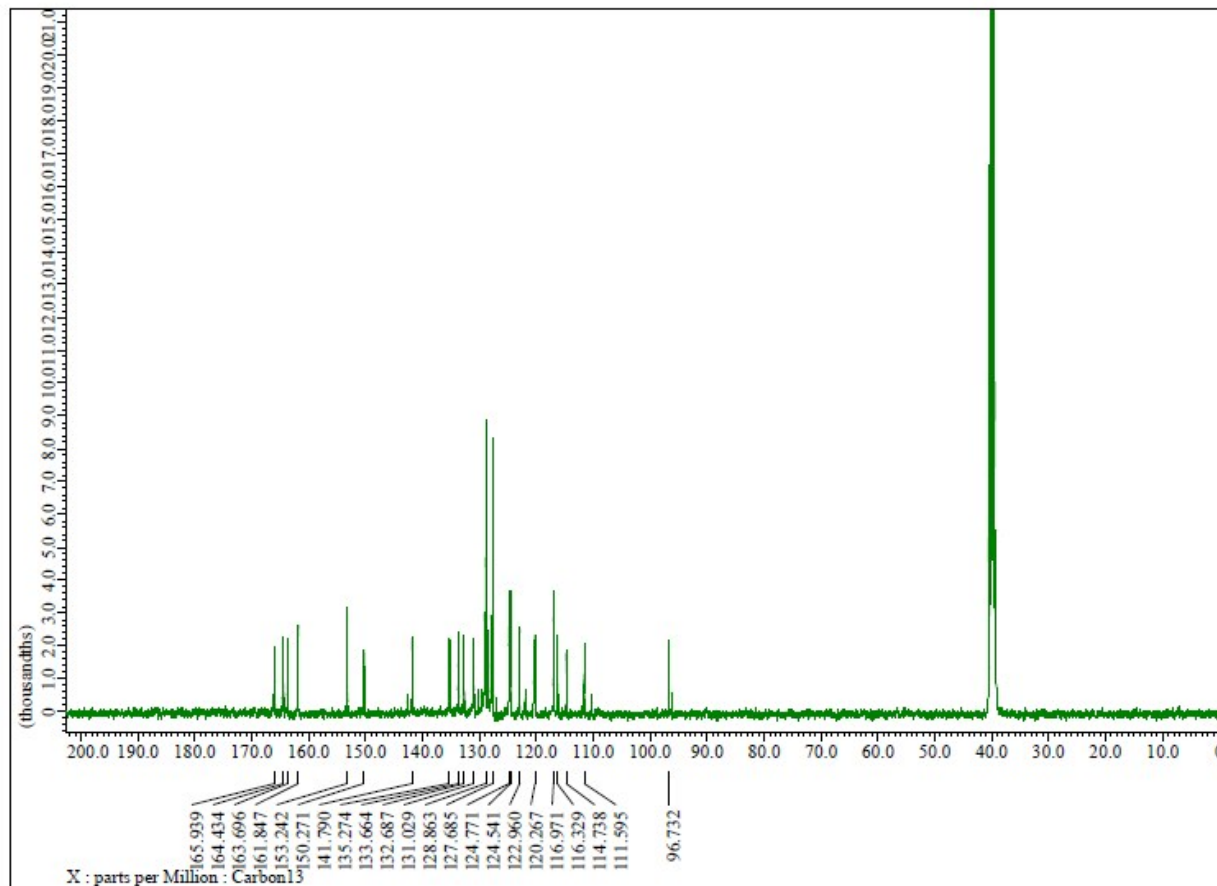



$^1\text{H}$  NMR of **5q**

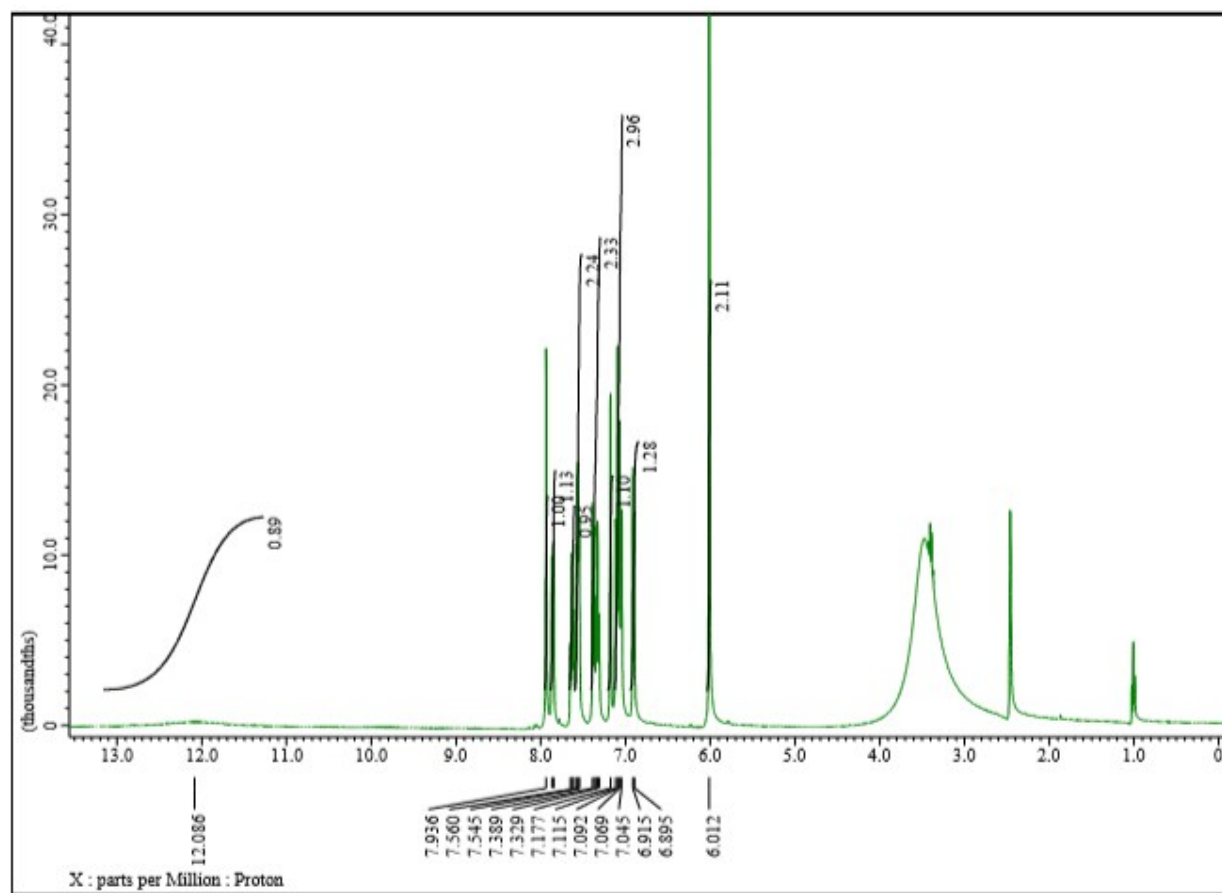

<sup>13</sup>C NMR of 5q

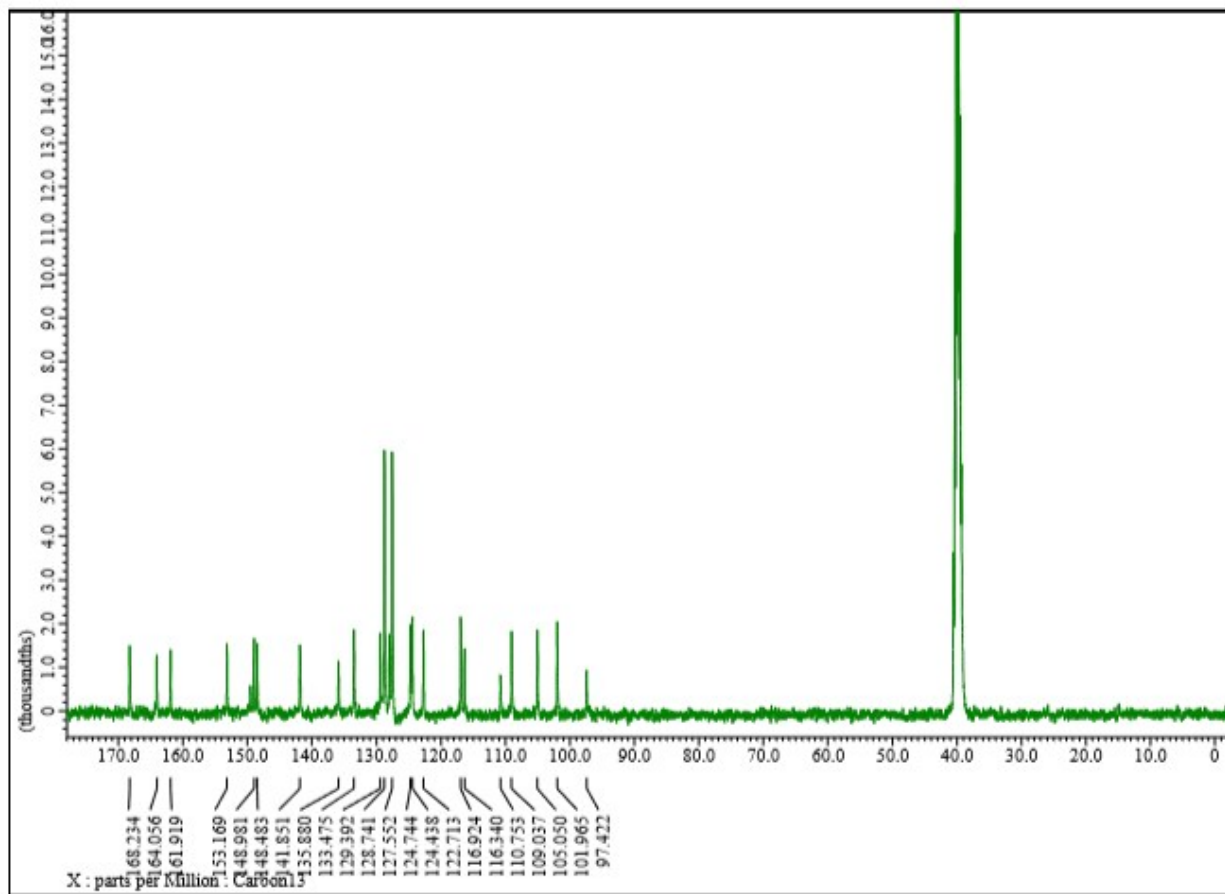

$^1\text{H}$  NMR of **5r**

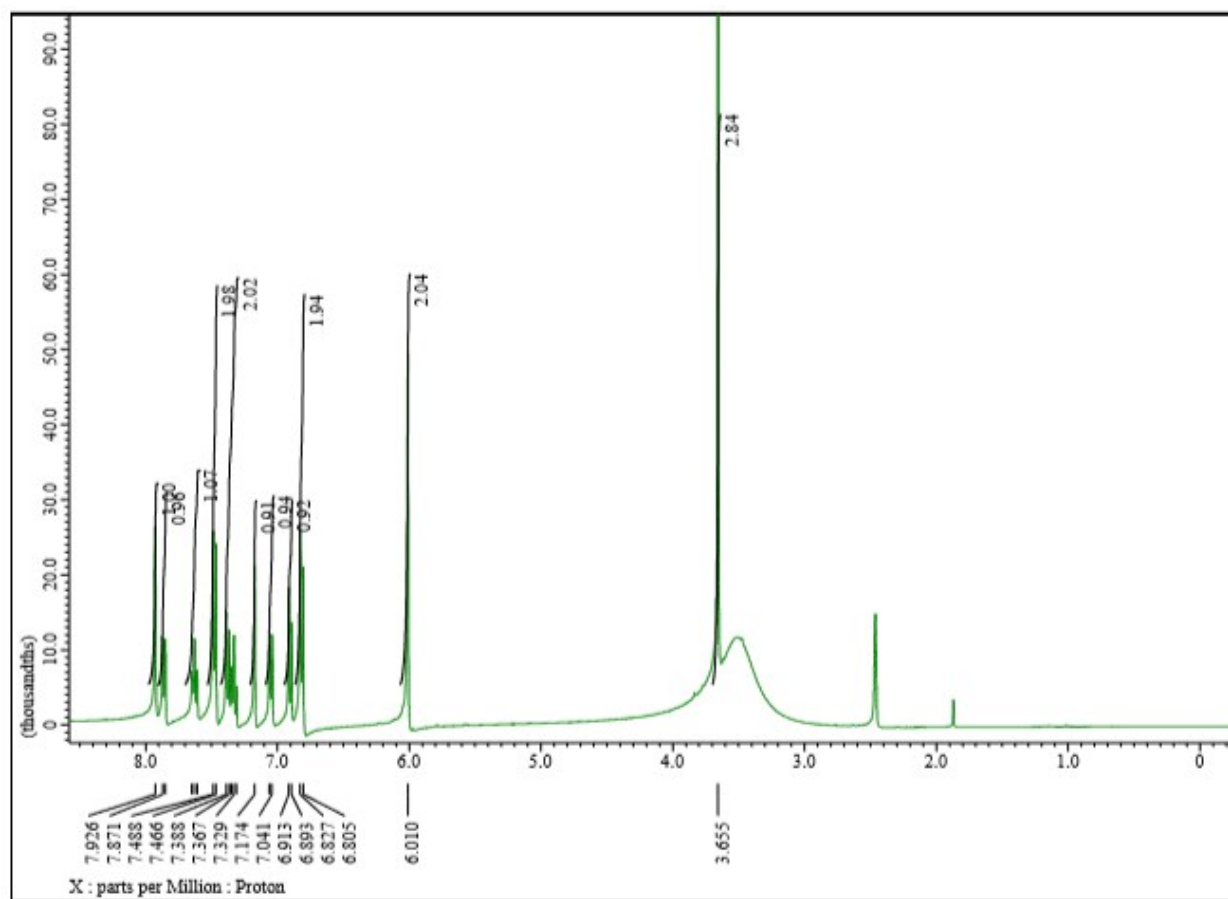

$^{13}\text{C}$  NMR of **5r**

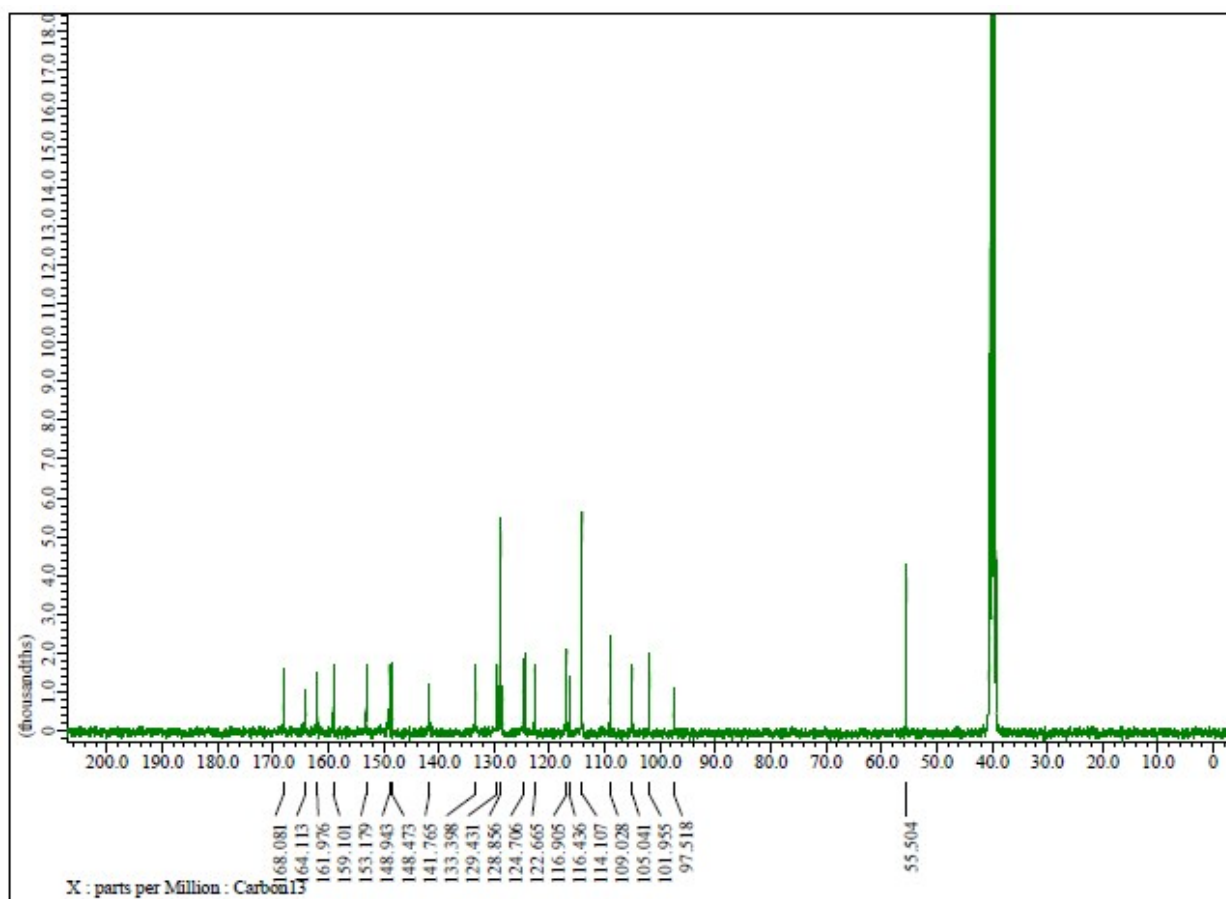

$^1\text{H}$  NMR of 5s

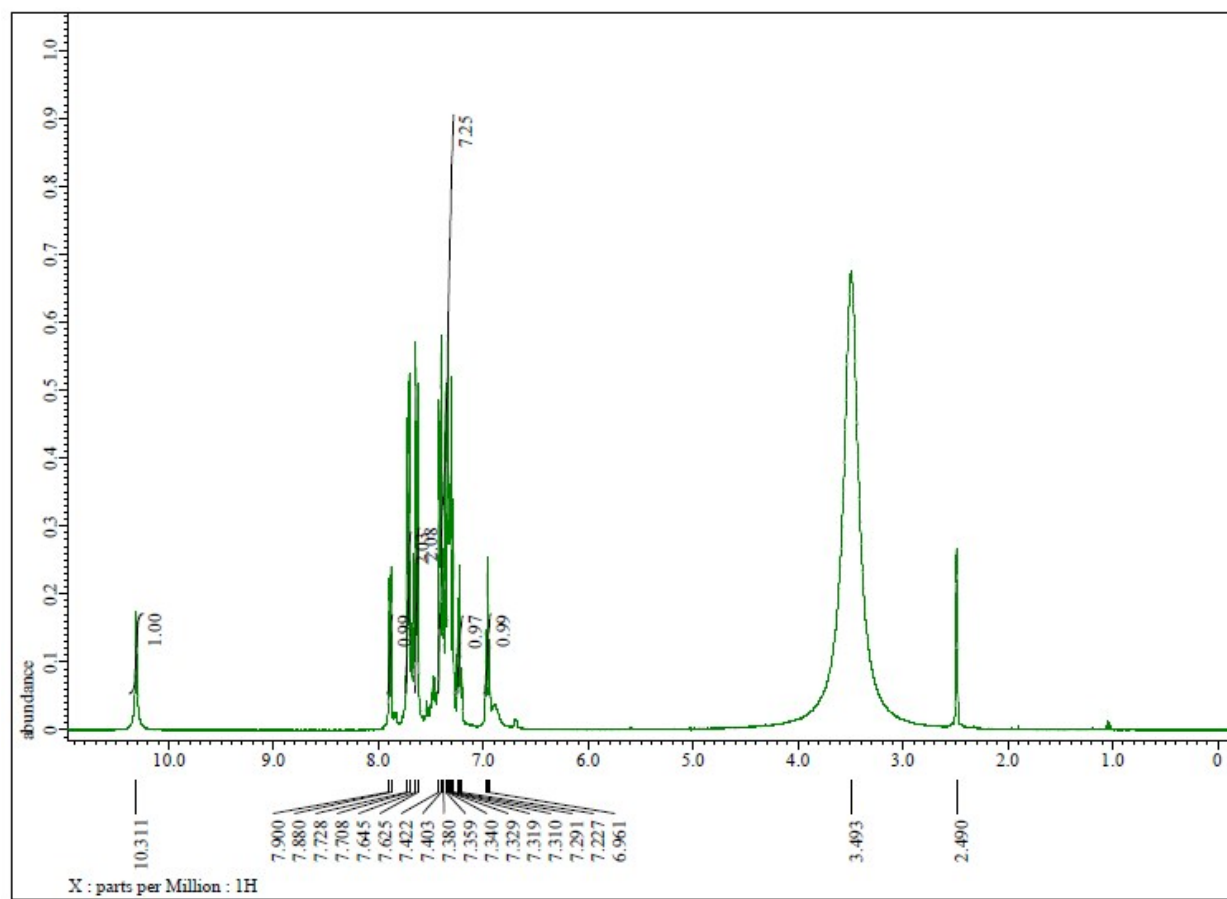

$^{13}\text{C}$  NMR of **5s**

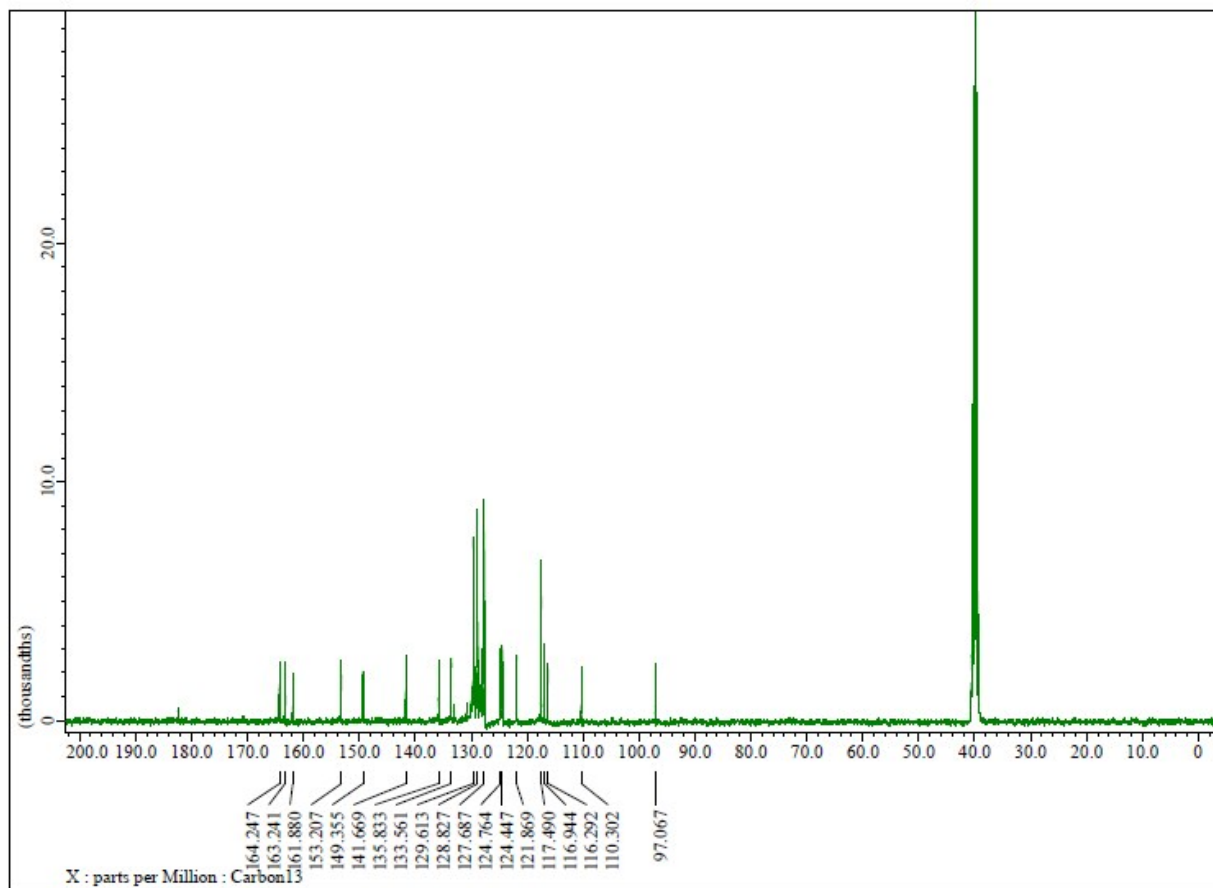

<sup>1</sup>H NMR of 5t

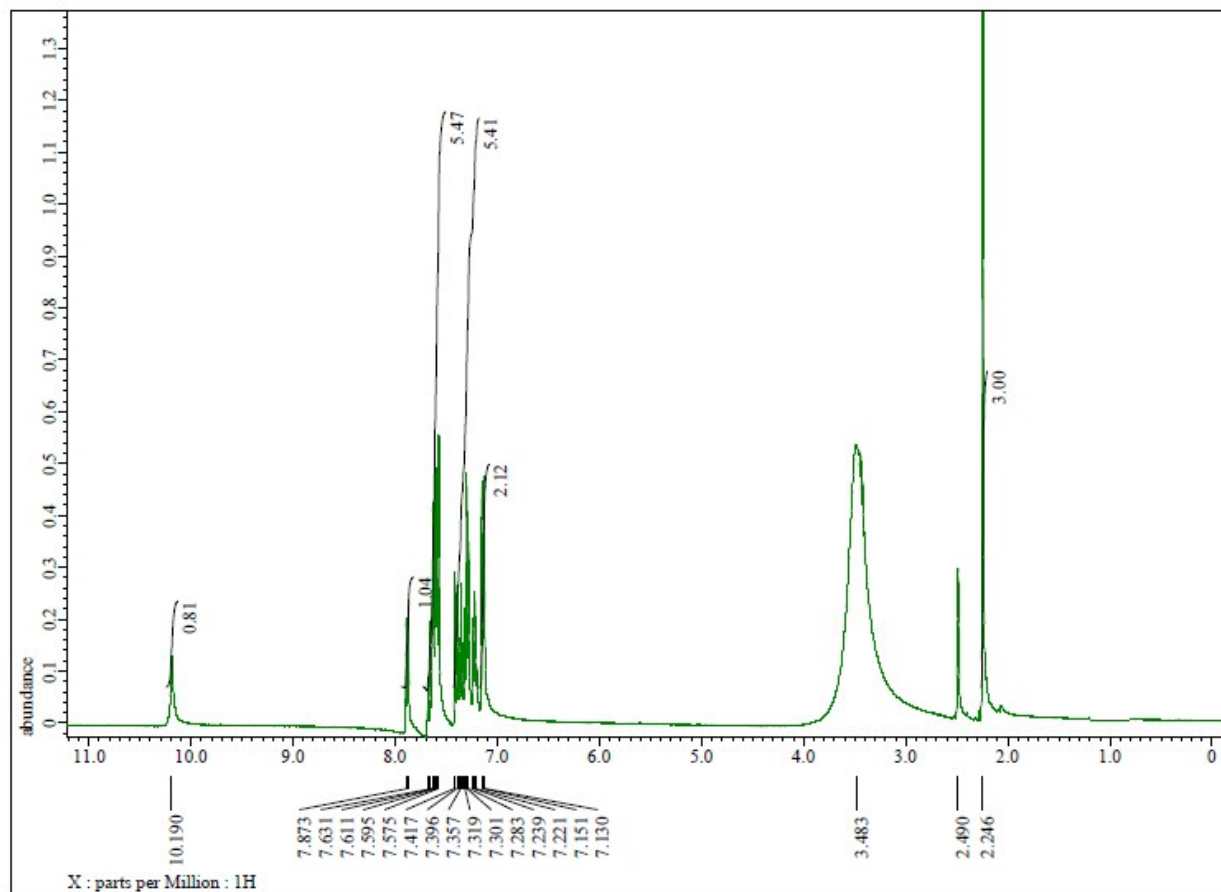

$^{13}\text{C}$  NMR of **5t**

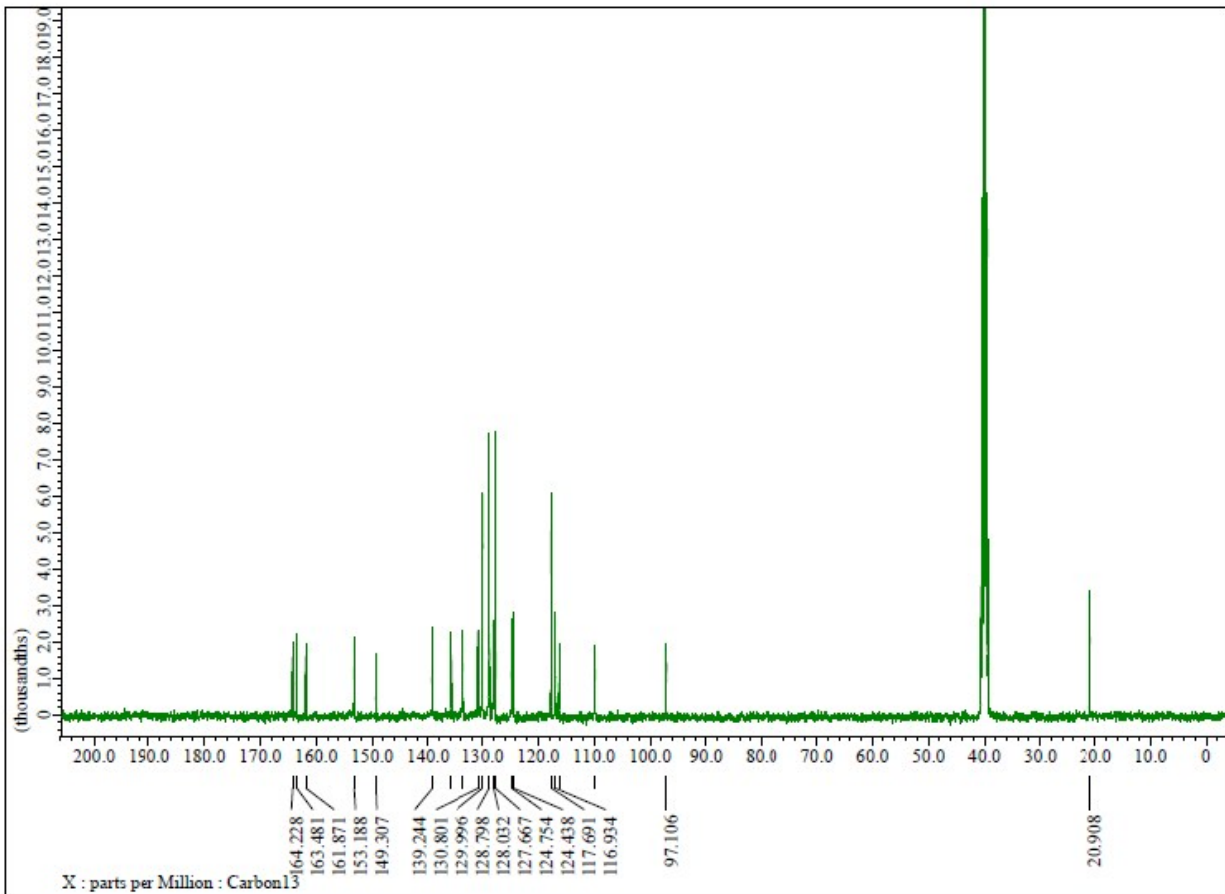

Supplement: c9nj01717h1.pdf [file c9nj01717h1.pdf]
